# Supplementary material for: El fortalecimiento del poder judicial chileno
Source: MDPI journal article supplement (doi:10.3390/antiox12122038), 1988-01-01
Supplement: s1 [file s1]

## Table S1. Programming codes in R.

### Characteristics of the population

```
vars <- c("Sex", "Age", "BMI", "Heart_rate", "TAS", "TAD", "Pcadera",
"Pcintura", "Smoking", "Drinking", "T2DM", "HT", "DLP", "Metabolic_syn",
"Statins", "Glucose", "Insulin", "HOMAIR", "TG", "CHOL", "HDL", "LDL",
"VLDL", "ALT", "AST", "GGT")
catvars <- c("Sex", "Smoking", "Drinking", "T2DM", "HT", "DLP", "Metabolic_syn",
"Statins")
table_1 <- CreateTableOne(data = Db, vars = vars, factorVars = catvars,
, strata = "Group")
print(table_1, nonnormal = vars, formatOptions = list(big.mark = ","))
```

### Normality test for PON1 variables

```
p_values <- sapply(pon1vars, function(var) {
  shapiro.test(Db[[var]])$p.value
})

suppl_table_1 <- data.frame(P_Value = p_values)

print(suppl_table_1)
```

### Confounding factors

#### Correlation between age and PON1

```
test_correlation <- function(variable_name, data) {
  correlation <- cor.test(data$Age, data[[variable_name]], method="spearman")
  return(data.frame(variable = variable_name, p_value = correlation$p.value))
}

suppl_table_2a <- do.call(rbind, lapply(pon1vars, test_correlation, data = Db))

print(suppl_table_2a)
```

#### Correlation between sex and PON1

```
test_sex_difference <- function(variable_name, data) {
  test <- wilcox.test(data[[variable_name]] ~ data$Sex)
  return(data.frame(variable = variable_name, p_value = test$p.value))
}

suppl_table_2b <- do.call(rbind, lapply(pon1vars, test_sex_difference, data = Db))

print(suppl_table_2b)
```

## Adjusting the dataset

```
lm_Paraxonase <- lm(Paraxonase ~ Sex, data = Db, na.action = "na.exclude")
Db$adj_Paraxonase <- residuals(lm_Paraxonase) + mean(na.omit(Db$Paraxonase), na.rm = TRUE)

lm_Lactonase <- lm(Lactonase ~ Age, data = Db, na.action = "na.exclude")
Db$adj_Lactonase <- residuals(lm_Lactonase) + mean(na.omit(Db$Lactonase), na.rm = TRUE)

adjpon1vars <- c("PON1c", "ARE_act_2022", "adj_Paraxonase", "adj_Lactonase")
```

## PON1 and obesity

```
plot <- ggplot(Db, aes(x = Group, y = PON1c, fill = Group)) +
  geom_boxplot(outlier.shape=NA, color = "black", size = 0.5) +
  stat_compare_means(label = "p", tip.length = 0, size = 4) +
  scale_fill_manual(values = c("#41a8d1", "#e3596d"),
                    labels = c("Non-obese", "Patients with morbid obesity")) +
  ylim(0, 300) +
  xlab("") +
  ylab("PON1 concentration (mg/L)") +
  theme_classic() +
  theme(axis.line = element_line(colour = "black", size = 0.5),
        panel.background = element_rect(fill = "white"),
        panel.grid.major = element_blank(),
        panel.grid.minor = element_blank(),
        axis.text = element_text(size = 12),
        axis.text.x = element_blank(),
        axis.ticks.x = element_blank(),
        axis.title = element_text(size = 14, face = "bold"),
        legend.position = "none",
        axis.ticks = element_line(colour = "black", size = 0.5),
        aspect.ratio = 2)
ggsave(filename = "Raw plots/Obesity/PON1c.pdf",
       plot = plot,
       device = "pdf",
       height = 3,
       width = 3)

plot <- ggplot(Db, aes(x = Group, y = ARE_act_2022, fill = Group)) +
  geom_boxplot(outlier.shape=NA, color = "black", size = 0.5) +
  stat_compare_means(label = "p", tip.length = 0, size = 4) +
  scale_fill_manual(values = c("#41a8d1", "#e3596d"),
                    labels = c("Non-obese", "Patients with morbid obesity")) +
  ylim(0, 600) +
  xlab("") +
  ylab("Arylesterase activity (U/L)") +
  theme_classic() +
  theme(axis.line = element_line(colour = "black", size = 0.5),
```

```

    panel.background = element_rect(fill = "white"),
    panel.grid.major = element_blank(),
    panel.grid.minor = element_blank(),
    axis.text = element_text(size = 12),
    axis.text.x = element_blank(),
    axis.ticks.x = element_blank(),
    axis.title = element_text(size = 14, face = "bold"),
    legend.position = "none",
    axis.ticks = element_line(colour = "black", size = 0.5),
    aspect.ratio = 2)
ggsave(filename = "Raw plots/Obesity/AREact.pdf",
        plot = plot,
        device = "pdf",
        height = 3,
        width = 3)

plot <- ggplot(Db, aes(x = Group, y = adj_Paraxonase, fill = Group)) +
  geom_boxplot(outlier.shape=NA, color = "black", size = 0.5) +
  stat_compare_means(label = "p", tip.length = 0, size = 4) +
  scale_fill_manual(values = c("#41a8d1", "#e3596d"),
                    labels = c("Non-obese", "Patients with morbid obes
ity")) +
  ylim(0, 800) +
  xlab("") +
  ylab("Paraoxonase activity (U/L)") +
  theme_classic() +
  theme(axis.line = element_line(colour = "black", size = 0.5),
        panel.background = element_rect(fill = "white"),
        panel.grid.major = element_blank(),
        panel.grid.minor = element_blank(),
        axis.text = element_text(size = 12),
        axis.text.x = element_blank(),
        axis.ticks.x = element_blank(),
        axis.title = element_text(size = 14, face = "bold"),
        legend.position = "none",
        axis.ticks = element_line(colour = "black", size = 0.5),
        aspect.ratio = 2)
ggsave(filename = "Raw plots/Obesity/Paraxact.pdf",
        plot = plot,
        device = "pdf",
        height = 3,
        width = 3)

plot <- ggplot(Db, aes(x = Group, y = adj_Lactonase, fill = Group)) +
  geom_boxplot(outlier.shape=NA, color = "black", size = 0.5) +
  stat_compare_means(label = "p", tip.length = 0, size = 4) +
  scale_fill_manual(values = c("#41a8d1", "#e3596d"),
                    labels = c("Non-obese", "Patients with morbid obes
ity")) +
  ylim(0, 18) +
  xlab("") +
  ylab("Lactonase activity (U/L)") +
  theme_classic() +
  theme(axis.line = element_line(colour = "black", size = 0.5),

```

```

    panel.background = element_rect(fill = "white"),
    panel.grid.major = element_blank(),
    panel.grid.minor = element_blank(),
    axis.text = element_text(size = 12),
    axis.text.x = element_blank(),
    axis.ticks.x = element_blank(),
    axis.title = element_text(size = 14, face = "bold"),
    legend.position = "none",
    axis.ticks = element_line(colour = "black", size = 0.5),
    aspect.ratio = 2)
ggsave(filename = "Raw plots/Obesity/Lactonact.pdf",
        plot = plot,
        device = "pdf",
        height = 3,
        width = 3)

```

## Is PON1 concentration and activity dependent from concomitant diseases?

```

# Select the relevant variables
dependent_vars <- c("PON1c", "ARE_act_2022", "adj_Paraxonase", "adj_La
ctonase")
independent_vars <- c("T2DM", "HT", "DLP", "Metabolic_syn")
dependence_test <- c(dependent_vars, independent_vars)
Db_dependence_test <- Db[, dependence_test]

# Fit a linear regression model for each dependent variable
models <- lapply(dependent_vars, function(var) {
  lm(as.formula(paste(var, "~.", sep = "")), data = Db_dependence_test
)
})

# Extract the p-values from the regression models and put them in a ta
ble
p_values <- sapply(models, function(model) {
  summary(model)$coefficients[2, 4]
})

suppl_table_3 <- data.frame(variable = dependent_vars, p_value = p_val
ues)

print(suppl_table_3)

# PON1c
T2DM_PON1c <- Db %>%
  filter(!is.na(T2DM)) %>%
  ggplot(aes(x = Group, y = PON1c, fill = factor(T2DM))) +
  geom_boxplot(outlier.shape = NA) +
  scale_fill_manual(values = c("#41a8d1", "#e3596d")) +
  labs(x = "Group", y = "PON1 concentration (mg/L)") +
  theme_classic() +
  theme(
    axis.line = element_line(color = "black"),
    axis.text = element_text(size = 12),
    axis.title = element_text(size = 14, face = "bold"),

```

```

    legend.position = "none",
    aspect.ratio = 1.3/1) +
ylim(0, 300)

p_value <- Db %>%
  filter(Group == "Obese") %>%
  wilcox_test(PON1c ~ T2DM) %>%
  pull(p)
cat("P-value PON1c (when participants suffer or not from T2DM and obes
ity) =", p_value, "\n")

p_value <- Db %>%
  filter(Group == "Control") %>%
  wilcox_test(PON1c ~ T2DM) %>%
  pull(p)

cat("P-value PON1c (when participants suffer or not from T2DM without
obesity) =", p_value, "\n")

ggsave(filename = "Raw plots/Obesity/T2DM_pon1c.pdf",
  plot = T2DM_PON1c,
  device = "pdf",
  height = 3,
  width = 3)

# ARE act
T2DM_ARE <- ggplot(Db, aes(x = Group, y = ARE_act_2022, fill = factor(
T2DM))) +
  geom_boxplot(outlier.shape = NA) +
  scale_fill_manual(values = c("#41a8d1", "#e3596d")) +
  labs(x = "Group", y = "Arylesterase activity (U/L)") +
  theme_classic() +
  theme(
    axis.line = element_line(color = "black"),
    axis.text = element_text(size = 12),
    axis.title = element_text(size = 14, face = "bold"),
    legend.position = "none",
    legend.text = element_text(size = 12),
    legend.title = element_blank(),
    aspect.ratio = 1.3/1
  )

p_value <- Db %>%
  filter(Group == "Obese") %>%
  wilcox_test(ARE_act_2022 ~ T2DM) %>%
  pull(p)
cat("P-value arylesterase activity (when participants suffer or not fr
om T2DM and obesity) =", p_value, "\n")

p_value <- Db %>%
  filter(Group == "Control") %>%
  wilcox_test(ARE_act_2022 ~ T2DM) %>%
  pull(p)

```

```

cat("P-value arylesterase activity (when participants suffer or not fr
om T2DM without obesity) =", p_value, "\n")

ggsave(filename = "Raw plots/Obesity/T2DM_AREact.pdf",
        plot = T2DM_ARE,
        device = "pdf",
        height = 3,
        width = 3)

# PARX act
T2DM_Parax <- Db %>%
  filter(!is.na(T2DM)) %>%
  ggplot(aes(x = Group, y = adj_Paraxonase, fill = factor(T2DM))) +
  geom_boxplot(outlier.shape = NA) +
  scale_fill_manual(values = c("#41a8d1", "#e3596d")) +
  labs(x = "Group", y = "Paraoxonase activity (U/L)") +
  theme_classic() +
  theme(
    axis.line = element_line(color = "black"),
    axis.text = element_text(size = 12),
    axis.title = element_text(size = 14, face = "bold"),
    legend.position = "none",
    aspect.ratio = 1.3/1) +
  ylim(0, 600)

p_value <- Db %>%
  filter(Group == "Obese") %>%
  wilcox_test(adj_Paraxonase ~ T2DM) %>%
  pull(p)
cat("P-value Paraoxonase activity (when participants suffer or not fro
m T2DM and obesity) =", p_value, "\n")

p_value <- Db %>%
  filter(Group == "Control") %>%
  wilcox_test(adj_Paraxonase ~ T2DM) %>%
  pull(p)

cat("P-value Paraoxonase activity (when participants suffer or not fro
m T2DM without obesity) =", p_value, "\n")

ggsave(filename = "Raw plots/Obesity/T2DM_parax.pdf",
        plot = T2DM_Parax,
        device = "pdf",
        height = 3,
        width = 3)

# LAC act
T2DM_Lacton <- Db %>%
  filter(!is.na(T2DM)) %>%
  ggplot(aes(x = Group, y = adj_Lactonase, fill = factor(T2DM))) +
  geom_boxplot(outlier.shape = NA) +
  scale_fill_manual(values = c("#41a8d1", "#e3596d")) +
  labs(x = "Group", y = "Lactonase activity (U/L)") +
  theme_classic() +

```

```

theme(
  axis.line = element_line(color = "black"),
  axis.text = element_text(size = 12),
  axis.title = element_text(size = 14, face = "bold"),
  legend.position = "none",
  aspect.ratio = 1.3/1) +
ylim(0, 15)

p_value <- Db %>%
  filter(Group == "Obese") %>%
  wilcox_test(adj_Lactonase ~ T2DM) %>%
  pull(p)
cat("P-value Lactonase activity (when participants suffer or not from
T2DM and obesity) =", p_value, "\n")

p_value <- Db %>%
  filter(Group == "Control") %>%
  wilcox_test(adj_Lactonase ~ T2DM) %>%
  pull(p)

cat("P-value Lactonase activity (when participants suffer or not from
T2DM without obesity) =", p_value, "\n")

ggsave(filename = "Raw plots/Obesity/T2DM_lacton.pdf",
  plot = T2DM_Lacton,
  device = "pdf",
  height = 3,
  width = 3)

# PON1c
HT_PON1c <- Db %>%
  filter(!is.na(HT)) %>%
  ggplot(aes(x = Group, y = PON1c, fill = factor(HT))) +
  geom_boxplot(outlier.shape = NA) +
  scale_fill_manual(values = c("#41a8d1", "#e3596d")) +
  labs(x = "Group", y = "PON1 concentration (mg/L)") +
  theme_classic() +
  theme(
    axis.line = element_line(color = "black"),
    axis.text = element_text(size = 12),
    axis.title = element_text(size = 14, face = "bold"),
    legend.position = "none",
    aspect.ratio = 1.3/1) +
ylim(0, 300)

p_value <- Db %>%
  filter(Group == "Obese") %>%
  wilcox_test(PON1c ~ HT) %>%
  pull(p)
cat("P-value (when participants suffer or not from HT and obesity) =",
p_value, "\n")

p_value <- Db %>%
  filter(Group == "Control") %>%

```

```

wilcox_test(PON1c ~ HT) %>%
pull(p)

cat("P-value (when participants suffer or not from HT without obesity)
=", p_value, "\n")

ggsave(filename = "Raw plots/Obesity/HT_pon1c.pdf",
        plot = HT_PON1c,
        device = "pdf",
        height = 3,
        width = 3)

# ARE act
HT_ARE <- ggplot(Db, aes(x = Group, y = ARE_act_2022, fill = factor(HT
))) +
  geom_boxplot(outlier.shape = NA) +
  scale_fill_manual(values = c("#41a8d1", "#e3596d")) +
  labs(x = "Group", y = "Arylesterase activity (U/L)") +
  theme_classic() +
  theme(
    axis.line = element_line(color = "black"),
    axis.text = element_text(size = 12),
    axis.title = element_text(size = 14, face = "bold"),
    legend.position = "none",
    legend.text = element_text(size = 12),
    legend.title = element_blank(),
    aspect.ratio = 1.3/1
  )

p_value <- Db %>%
  filter(Group == "Obese") %>%
  wilcox_test(ARE_act_2022 ~ HT) %>%
  pull(p)
cat("P-value (when participants suffer or not from HT and obesity) =",
p_value, "\n")

p_value <- Db %>%
  filter(Group == "Control") %>%
  wilcox_test(ARE_act_2022 ~ HT) %>%
  pull(p)

cat("P-value (when participants suffer or not from HT without obesity)
=", p_value, "\n")

ggsave(filename = "Raw plots/Obesity/HT_are.pdf",
        plot = HT_ARE,
        device = "pdf",
        height = 3,
        width = 3)

# PARX act
HT_Parax <- Db %>%
  filter(!is.na(HT)) %>%
  ggplot(aes(x = Group, y = adj_Paraxonase, fill = factor(HT))) +

```



```

geom_boxplot(outlier.shape = NA) +
scale_fill_manual(values = c("#41a8d1", "#e3596d")) +
labs(x = "Group", y = "Paraxonase activity (U/L)") +
theme_classic() +
theme(
  axis.line = element_line(color = "black"),
  axis.text = element_text(size = 12),
  axis.title = element_text(size = 14, face = "bold"),
  legend.position = "none",
  aspect.ratio = 1.3/1) +
ylim(0, 600)

p_value <- Db %>%
  filter(Group == "Obese") %>%
  wilcox_test(adj_Paraxonase ~ HT) %>%
  pull(p)
cat("P-value (when participants suffer or not from HT and obesity) =",
p_value, "\n")

p_value <- Db %>%
  filter(Group == "Control") %>%
  wilcox_test(adj_Paraxonase ~ HT) %>%
  pull(p)

cat("P-value (when participants suffer or not from HT without obesity)
=", p_value, "\n")

ggsave(filename = "Raw plots/Obesity/HT_Parax.pdf",
  plot = HT_Parax,
  device = "pdf",
  height = 3,
  width = 3)

# LAC act
HT_Lacton <- Db %>%
  filter(!is.na(HT)) %>%
  ggplot(aes(x = Group, y = adj_Lactonase, fill = factor(HT))) +
  geom_boxplot(outlier.shape = NA) +
  scale_fill_manual(values = c("#41a8d1", "#e3596d")) +
  labs(x = "Group", y = "Lactonase activity (U/L)") +
  theme_classic() +
  theme(
    axis.line = element_line(color = "black"),
    axis.text = element_text(size = 12),
    axis.title = element_text(size = 14, face = "bold"),
    legend.position = "none",
    aspect.ratio = 1.3/1) +
  ylim(0, 15)

p_value <- Db %>%
  filter(Group == "Obese") %>%
  wilcox_test(adj_Lactonase ~ HT) %>%
  pull(p)
cat("P-value (when participants suffer or not from HT and obesity) =",

```

```

p_value, "\n")

p_value <- Db %>%
  filter(Group == "Control") %>%
  wilcox_test(adj_Lactonase ~ HT) %>%
  pull(p)

cat("P-value (when participants suffer or not from HT without obesity)
=", p_value, "\n")

ggsave(filename = "Raw plots/Obesity/HT_lacton.pdf",
  plot = HT_Lacton,
  device = "pdf",
  height = 3,
  width = 3)

# PON1c
DLP_PON1c <- Db %>%
  filter(!is.na(DLP)) %>%
  ggplot(aes(x = Group, y = PON1c, fill = factor(DLP))) +
  geom_boxplot(outlier.shape = NA) +
  scale_fill_manual(values = c("#41a8d1", "#e3596d")) +
  labs(x = "Group", y = "PON1 concentration (mg/L)") +
  theme_classic() +
  theme(
    axis.line = element_line(color = "black"),
    axis.text = element_text(size = 12),
    axis.title = element_text(size = 14, face = "bold"),
    legend.position = "none",
    aspect.ratio = 1.3/1) +
  ylim(0, 300)

p_value <- Db %>%
  filter(Group == "Obese") %>%
  wilcox_test(PON1c ~ DLP) %>%
  pull(p)

cat("P-value (when participants suffer or not from DLP and obesity) ="
, p_value, "\n")

p_value <- Db %>%
  filter(Group == "Control") %>%
  wilcox_test(PON1c ~ DLP) %>%
  pull(p)

cat("P-value (when participants suffer or not from DLP without obesity
) =", p_value, "\n")

ggsave(filename = "Raw plots/Obesity/DLP_pon1c.pdf",
  plot = DLP_PON1c,
  device = "pdf",
  height = 3,
  width = 3)

# ARE act
DLP_ARE <- ggplot(Db, aes(x = Group, y = ARE_act_2022, fill = factor(D

```

```

LP))) +
  geom_boxplot(outlier.shape = NA) +
  scale_fill_manual(values = c("#41a8d1", "#e3596d")) +
  labs(x = "Group", y = "Arylesterase activity (U/L)") +
  theme_classic() +
  theme(
    axis.line = element_line(color = "black"),
    axis.text = element_text(size = 12),
    axis.title = element_text(size = 14, face = "bold"),
    legend.position = "none",
    legend.text = element_text(size = 12),
    legend.title = element_blank(),
    aspect.ratio = 1.3/1
  )

p_value <- Db %>%
  filter(Group == "Obese") %>%
  wilcox_test(ARE_act_2022 ~ DLP) %>%
  pull(p)
cat("P-value (when participants suffer or not from DLP and obesity) ="
, p_value, "\n")

p_value <- Db %>%
  filter(Group == "Control") %>%
  wilcox_test(ARE_act_2022 ~ DLP) %>%
  pull(p)

cat("P-value (when participants suffer or not from DLP without obesity
) =", p_value, "\n")

ggsave(filename = "Raw plots/Obesity/DLP_are.pdf",
  plot = DLP_ARE,
  device = "pdf",
  height = 3,
  width = 3)

# PARX act
DLP_Parax <- Db %>%
  filter(!is.na(DLP)) %>%
  ggplot(aes(x = Group, y = adj_Paraxonase, fill = factor(DLP))) +
  geom_boxplot(outlier.shape = NA) +
  scale_fill_manual(values = c("#41a8d1", "#e3596d")) +
  labs(x = "Group", y = "Paraoxonase activity (U/L)") +
  theme_classic() +
  theme(
    axis.line = element_line(color = "black"),
    axis.text = element_text(size = 12),
    axis.title = element_text(size = 14, face = "bold"),
    legend.position = "none",
    aspect.ratio = 1.3/1) +
  ylim(0, 600)

p_value <- Db %>%
  filter(Group == "Obese") %>%

```

```

    wilcox_test(adj_Paraxonase ~ DLP) %>%
    pull(p)
cat("P-value (when participants suffer or not from DLP and obesity) ="
, p_value, "\n")

p_value <- Db %>%
  filter(Group == "Control") %>%
  wilcox_test(adj_Paraxonase ~ DLP) %>%
  pull(p)

cat("P-value (when participants suffer or not from DLP without obesity
) =", p_value, "\n")

ggsave(filename = "Raw plots/Obesity/DLP_parax.pdf",
  plot = DLP_Parax,
  device = "pdf",
  height = 3,
  width = 3)

# LAC act
DLP_Lacton <- Db %>%
  filter(!is.na(DLP)) %>%
  ggplot(aes(x = Group, y = adj_Lactonase, fill = factor(DLP))) +
  geom_boxplot(outlier.shape = NA) +
  scale_fill_manual(values = c("#41a8d1", "#e3596d")) +
  labs(x = "Group", y = "Lactonase activity (U/L)") +
  theme_classic() +
  theme(
    axis.line = element_line(color = "black"),
    axis.text = element_text(size = 12),
    axis.title = element_text(size = 14, face = "bold"),
    legend.position = "none",
    aspect.ratio = 1.3/1) +
  ylim(0, 15)

p_value <- Db %>%
  filter(Group == "Obese") %>%
  wilcox_test(adj_Lactonase ~ DLP) %>%
  pull(p)
cat("P-value (when participants suffer or not from DLP and obesity) ="
, p_value, "\n")

p_value <- Db %>%
  filter(Group == "Control") %>%
  wilcox_test(adj_Lactonase ~ DLP) %>%
  pull(p)

cat("P-value (when participants suffer or not from DLP without obesity
) =", p_value, "\n")

ggsave(filename = "Raw plots/Obesity/DLP_lacton.pdf",
  plot = DLP_Lacton,
  device = "pdf",

```

```

    height = 3,
    width = 3)

# PON1c
Db_filt <- Db %>%
  filter(complete.cases(PON1c, HDL))
cor_plot_PON1c <- ggscatter(Db_filt, x = "HDL", y = "PON1c",
  add = "reg.line", conf.int = TRUE,
  cor.coef = TRUE, cor.method = "spearman",
  title = "Correlation between HDL cholesterol and PON1 concentration",
  xlab = "HDL chol (mmol/L)", ylab = "PON1 concentration (mg/L)",
  legend.title = "none") +
  theme_classic()
  theme(
    axis.line = element_line(color = "black"),
    axis.text = element_text(size = 12),
    axis.title = element_text(size = 12, face = "bold"),
    aspect.ratio = 1/1
  )

ggsave(filename = "Raw plots/Obesity/Corr2HDL_PON1c.pdf",
  plot = cor_plot_PON1c,
  device = "pdf",
  height = 2.5,
  width = 2.5)

# ARE act
Db_filt <- Db %>% filter(Db$HDL<4)
Db_filt <- Db_filt %>%
  filter(complete.cases(ARE_act_2022, HDL))
cor_plot_ARE <- ggscatter(Db_filt, x = "HDL", y = "ARE_act_2022",
  add = "reg.line", conf.int = TRUE,
  cor.coef = TRUE, cor.method = "spearman",
  title = "Correlation between HDL cholesterol and Arylesterase activity",
  xlab = "HDL chol (mmol/L)", ylab = "Arylesterase activity (U/L)",
  legend.title = "none") +
  theme_classic() +
  theme(
    axis.line = element_line(color = "black"),
    axis.text = element_text(size = 12),
    axis.title = element_text(size = 12, face = "bold"),
    aspect.ratio = 1/1
  )

ggsave(filename = "Raw plots/Obesity/Corr2HDL_ARE.pdf",
  plot = cor_plot_ARE,
  device = "pdf",
  height = 2.5,
  width = 2.5)

```

```

# PARX act
Db_filt <- Db %>%
  filter(complete.cases(adj_Paraxonase, HDL))
cor_plot_Parax <- ggscatter(Db_filt, x = "HDL", y = "adj_Paraxonase",
  add = "reg.line", conf.int = TRUE,
  cor.coef = TRUE, cor.method = "spearman",
  title = "Correlation between HDL cholesterol and Paraxonase activity",
  xlab = "HDL chol (mmol/L)", ylab = "Paraxonase activity (U/L)",
  legend.title = "none") +
  theme_classic() +
  theme(
    axis.line = element_line(color = "black"),
    axis.text = element_text(size = 12),
    axis.title = element_text(size = 12, face = "bold"),
    aspect.ratio = 1/1
  )

ggsave(filename = "Raw plots/Obesity/Corr2HDL_Parax.pdf",
  plot = cor_plot_Parax,
  device = "pdf",
  height = 2.5,
  width = 2.5)

# LAC act
Db_filt <- Db %>%
  filter(complete.cases(adj_Lactonase, HDL))
cor_plot_Lacton <- ggscatter(Db_filt, x = "HDL", y = "adj_Lactonase",
  add = "reg.line", conf.int = TRUE,
  cor.coef = TRUE, cor.method = "spearman",
  title = "Correlation between HDL cholesterol and Lactonase activity",
  xlab = "HDL chol (mmol/L)", ylab = "Lactonase activity (U/L)",
  legend.title = "none") +
  theme_classic() +
  theme(
    axis.line = element_line(color = "black"),
    axis.text = element_text(size = 12),
    axis.title = element_text(size = 12, face = "bold"),
    aspect.ratio = 1/1
  )

ggsave(filename = "Raw plots/Obesity/Corr2HDL_Lacton.pdf",
  plot = cor_plot_Lacton,
  device = "pdf",
  height = 2.5,
  width = 2.5)

# PON1c
Stat_PON1c <- Db %>%
  filter(Group == "Obese") %>%
  filter(!is.na(Statins)) %>%

```

```

ggplot(aes(x = Group, y = PON1c, fill = factor(Statins))) +
  geom_boxplot(outlier.shape = NA) +
  scale_fill_manual(values = c("#41a8d1", "#e3596d")) +
  labs(x = "Group", y = "PON1 concentration (mg/L)") +
  theme_classic() +
  theme(
    axis.line = element_line(color = "black"),
    axis.text = element_text(size = 12),
    axis.title = element_text(size = 14, face = "bold"),
    legend.position = "none",
    aspect.ratio = 1.3/0.5) +
  ylim(0, 300)

p_value <- Db %>%
  filter(Group == "Obese") %>%
  wilcox_test(PON1c ~ Statins) %>%
  pull(p)
cat("P-value (when participants take or not Statins) =", p_value, "\n"
)

ggsave(filename = "Raw plots/Obesity/statins_pon1c.pdf",
  plot = Stat_PON1c,
  device = "pdf",
  height = 3,
  width = 3)

# ARE act
Stat_ARE <- Db %>%
  filter(Group == "Obese") %>%
  filter(!is.na(Statins)) %>%
  ggplot(aes(x = Group, y = ARE_act_2022, fill = factor(Statins))) +
  geom_boxplot(outlier.shape = NA) +
  scale_fill_manual(values = c("#41a8d1", "#e3596d")) +
  labs(x = "Group", y = "Arylesterase activity (U/L)") +
  theme_classic() +
  theme(
    axis.line = element_line(color = "black"),
    axis.text = element_text(size = 12),
    axis.title = element_text(size = 14, face = "bold"),
    legend.position = "none",
    legend.text = element_text(size = 12),
    legend.title = element_blank(),
    aspect.ratio = 1.3/0.5
  )

p_value <- Db %>%
  filter(Group == "Obese") %>%
  wilcox_test(ARE_act_2022 ~ Statins) %>%
  pull(p)
cat("P-value (when participants take or not Statins) =", p_value, "\n"
)

ggsave(filename = "Raw plots/Obesity/statins_are.pdf",
  plot = Stat_ARE,

```

```

    device = "pdf",
    height = 3,
    width = 3)

# PARX act
Stat_Parax <- Db %>%
  filter(Group == "Obese") %>%
  filter(!is.na(Statins)) %>%
  ggplot(aes(x = Group, y = adj_Paraxonase, fill = factor(Statins))) +
  geom_boxplot(outlier.shape = NA) +
  scale_fill_manual(values = c("#41a8d1", "#e3596d")) +
  labs(x = "Group", y = "Paraoxonase activity (U/L)") +
  theme_classic() +
  theme(
    axis.line = element_line(color = "black"),
    axis.text = element_text(size = 12),
    axis.title = element_text(size = 14, face = "bold"),
    legend.position = "none",
    aspect.ratio = 1.3/0.5) +
  ylim(0, 600)

p_value <- Db %>%
  filter(Group == "Obese") %>%
  wilcox_test(adj_Paraxonase ~ Statins) %>%
  pull(p)
cat("P-value (when participants take or not Statins) =", p_value, "\n"
)

ggsave(filename = "Raw plots/Obesity/statins_parax.pdf",
  plot = Stat_Parax,
  device = "pdf",
  height = 3,
  width = 3)

# LAC act
Stat_Lacton <- Db %>%
  filter(Group == "Obese") %>%
  filter(!is.na(Statins)) %>%
  ggplot(aes(x = Group, y = adj_Lactonase, fill = factor(Statins))) +
  geom_boxplot(outlier.shape = NA) +
  scale_fill_manual(values = c("#41a8d1", "#e3596d")) +
  labs(x = "Group", y = "Lactonase activity (U/L)") +
  theme_classic() +
  theme(
    axis.line = element_line(color = "black"),
    axis.text = element_text(size = 12),
    axis.title = element_text(size = 14, face = "bold"),
    legend.position = "none",
    aspect.ratio = 1.3/0.5) +
  ylim(0, 15)

p_value <- Db %>%
  filter(Group == "Obese") %>%
  wilcox_test(adj_Lactonase ~ Statins) %>%

```



```

    pull(p)
cat("P-value (when participants take or not statins) =", p_value, "\n"
)

ggsave(filename = "Raw plots/Obesity/statins_lacton.pdf",
        plot = Stat_Lacton,
        device = "pdf",
        height = 3,
        width = 3)

# PON1c
Metabolic_syn_PON1c <- Db %>%
  filter(!is.na(Metabolic_syn)) %>%
  ggplot(aes(x = Group, y = PON1c, fill = factor(Metabolic_syn))) +
  geom_boxplot(outlier.shape = NA) +
  scale_fill_manual(values = c("#41a8d1", "#e3596d")) +
  labs(x = "Group", y = "PON1 concentration (mg/L)") +
  theme_classic() +
  theme(
    axis.line = element_line(color = "black"),
    axis.text = element_text(size = 12),
    axis.title = element_text(size = 14, face = "bold"),
    legend.position = "none",
    aspect.ratio = 1.3/1) +
  ylim(0, 300)

p_value <- Db %>%
  filter(Group == "Obese") %>%
  wilcox_test(PON1c ~ Metabolic_syn) %>%
  pull(p)
cat("P-value PON1 c (when participants suffer or not from Metabolic_sy
n and obesity) =", p_value, "\n")

p_value <- Db %>%
  filter(Group == "Control") %>%
  wilcox_test(PON1c ~ Metabolic_syn) %>%
  pull(p)

cat("P-value PON1 c (when participants suffer or not from Metabolic_sy
n without obesity) =", p_value, "\n")

ggsave(filename = "Raw plots/Obesity/MetS_pon1c.pdf",
        plot = Metabolic_syn_PON1c,
        device = "pdf",
        height = 3,
        width = 3)

# ARE act
Metabolic_syn_ARE <- ggplot(Db, aes(x = Group, y = ARE_act_2022, fill
= factor(HT))) +
  geom_boxplot(outlier.shape = NA) +
  scale_fill_manual(values = c("#41a8d1", "#e3596d")) +
  labs(x = "Group", y = "Arylesterease activity (U/L)") +
  theme_classic() +

```

```

theme(
  axis.line = element_line(color = "black"),
  axis.text = element_text(size = 12),
  axis.title = element_text(size = 14, face = "bold"),
  legend.position = "none",
  legend.text = element_text(size = 12),
  legend.title = element_blank(),
  aspect.ratio = 1.3/1
)

p_value <- Db %>%
  filter(Group == "Obese") %>%
  wilcox_test(ARE_act_2022 ~ Metabolic_syn) %>%
  pull(p)
cat("P-value ARE (when participants suffer or not from Metabolic_syn and obesity) =", p_value, "\n")

p_value <- Db %>%
  filter(Group == "Control") %>%
  wilcox_test(ARE_act_2022 ~ Metabolic_syn) %>%
  pull(p)

cat("P-value ARE (when participants suffer or not from Metabolic_syn without obesity) =", p_value, "\n")

ggsave(filename = "Raw plots/Obesity/MetS_are.pdf",
  plot = Metabolic_syn_ARE,
  device = "pdf",
  height = 3,
  width = 3)

# PARX act
Metabolic_syn_Parax <- Db %>%
  filter(!is.na(Metabolic_syn)) %>%
  ggplot(aes(x = Group, y = adj_Paraxonase, fill = factor(Metabolic_syn))) +
  geom_boxplot(outlier.shape = NA) +
  scale_fill_manual(values = c("#41a8d1", "#e3596d")) +
  labs(x = "Group", y = "Paraoxonasae activity (U/L)") +
  theme_classic() +
  theme(
    axis.line = element_line(color = "black"),
    axis.text = element_text(size = 12),
    axis.title = element_text(size = 14, face = "bold"),
    legend.position = "none",
    aspect.ratio = 1.3/1) +
  ylim(0, 600)

p_value <- Db %>%
  filter(Group == "Obese") %>%
  wilcox_test(adj_Paraxonase ~ Metabolic_syn) %>%
  pull(p)
cat("P-value Paraoxonasae act (when participants suffer or not from Metabolic_syn and obesity) =", p_value, "\n")

```

```

p_value <- Db %>%
  filter(Group == "Control") %>%
  wilcox_test(adj_Paraxonase ~ Metabolic_syn) %>%
  pull(p)

cat("P-value Paraoxonase act (when participants suffer or not from Metabolic_syn without obesity) =", p_value, "\n")

ggsave(filename = "Raw plots/Obesity/MetS_parax.pdf",
  plot = Metabolic_syn_Parax,
  device = "pdf",
  height = 3,
  width = 3)

# LAC act
Metabolic_syn_Lacton <- Db %>%
  filter(!is.na(Metabolic_syn)) %>%
  ggplot(aes(x = Group, y = adj_Lactonase, fill = factor(Metabolic_syn))) +
  geom_boxplot(outlier.shape = NA) +
  scale_fill_manual(values = c("#41a8d1", "#e3596d")) +
  labs(x = "Group", y = "Lactonase activity (U/L)") +
  theme_classic() +
  theme(
    axis.line = element_line(color = "black"),
    axis.text = element_text(size = 12),
    axis.title = element_text(size = 14, face = "bold"),
    legend.position = "none",
    aspect.ratio = 1.3/1) +
  ylim(0, 15)

p_value <- Db %>%
  filter(Group == "Obese") %>%
  wilcox_test(adj_Lactonase ~ Metabolic_syn) %>%
  pull(p)

cat("P-value Lactonase act (when participants suffer or not from Metabolic_syn and obesity) =", p_value, "\n")

p_value <- Db %>%
  filter(Group == "Control") %>%
  wilcox_test(adj_Lactonase ~ Metabolic_syn) %>%
  pull(p)

cat("P-value Lactonase act (when participants suffer or not from Metabolic_syn without obesity) =", p_value, "\n")

ggsave(filename = "Raw plots/Obesity/MetS_Lacton.pdf",
  plot = Metabolic_syn_Lacton,
  device = "pdf",
  height = 3,
  width = 3)

```

## BMI, waist circumference, and PON1

```
# PON1c
Db_filt <- Db %>%
  filter(complete.cases(PON1c, BMI))
cor_plot_PON1c <- ggscatter(Db_filt, x = "BMI", y = "PON1c",
  add = "reg.line", conf.int = TRUE,
  cor.coef = TRUE, cor.method = "spearman",
  title = "Correlation between BMI and PON1
concentration",
  xlab = "BMI (kg/m2)", ylab = "PON1 concent
ration (mg/L)",
  legend.title = "none") +
  theme_classic() +
  theme(
    axis.line = element_line(color = "black"),
    axis.text = element_text(size = 12),
    axis.title = element_text(size = 12, face = "bold"),
    aspect.ratio = 1/1
  )

# ARE act
Db_filt <- Db %>%
  filter(complete.cases(ARE_act_2022, BMI))
cor_plot_ARE <- ggscatter(Db_filt, x = "BMI", y = "ARE_act_2022",
  add = "reg.line", conf.int = TRUE,
  cor.coef = TRUE, cor.method = "spearman",
  title = "Correlation between BMI and aryle
sterase activity",
  xlab = "BMI (kg/m2)", ylab = "Arylesterase
activity (U/L)",
  legend.title = "none") +
  theme_classic() +
  theme(
    axis.line = element_line(color = "black"),
    axis.text = element_text(size = 12),
    axis.title = element_text(size = 12, face = "bold"),
    aspect.ratio = 1/1
  )

# PARX act
Db_filt <- Db %>%
  filter(complete.cases(adj_Paraxonase, BMI))
cor_plot_Parax <- ggscatter(Db_filt, x = "BMI", y = "adj_Paraxonase",
  add = "reg.line", conf.int = TRUE,
  cor.coef = TRUE, cor.method = "spearman",
  title = "Correlation between BMI and Parax
onase activity",
  xlab = "BMI (kg/m2)", ylab = "Paraxonase a
ctivity (U/L)",
  legend.title = "none") +
  theme_classic() +
  theme(
    axis.line = element_line(color = "black"),
    axis.text = element_text(size = 12),
```

```

    axis.title = element_text(size = 12, face = "bold"),
    aspect.ratio = 1/1
  )

# LAC act
Db_filt <- Db %>%
  filter(complete.cases(adj_Lactonase, BMI))
cor_plot_Lacto <- ggscatter(Db_filt, x = "BMI", y = "adj_Lactonase",
  add = "reg.line", conf.int = TRUE,
  cor.coef = TRUE, cor.method = "spearman",
  title = "Correlation between BMI and Lacto
nase activity",
  xlab = "BMI (kg/m2)", ylab = "Lactonase ac
tivity (U/L)",
  legend.title = "none") +
  theme_classic() +
  theme(
    axis.line = element_line(color = "black"),
    axis.text = element_text(size = 12),
    axis.title = element_text(size = 12, face = "bold"),
    aspect.ratio = 1/1
  )

# Save the plots
ggsave(filename = "Raw plots/Obesity/cor2BMI_PON1c.pdf",
  plot = cor_plot_PON1c,
  device = "pdf",
  height = 2.5,
  width = 2.5)
ggsave(filename = "Raw plots/Obesity/cor2BMI_are.pdf",
  plot = cor_plot_ARE,
  device = "pdf",
  height = 2.5,
  width = 2.5)
ggsave(filename = "Raw plots/Obesity/cor2BMI_parax.pdf",
  plot = cor_plot_Parax,
  device = "pdf",
  height = 2.5,
  width = 2.5)
ggsave(filename = "Raw plots/Obesity/cor2BMI_Lacton.pdf",
  plot = cor_plot_Lacto,
  device = "pdf",
  height = 2.5,
  width = 2.5)

# PON1c
Db_filt <- Db %>%
  filter(complete.cases(PON1c, Pcintura))
cor_plot_PON1c <- ggscatter(Db_filt, x = "Pcintura", y = "PON1c",
  add = "reg.line", conf.int = TRUE,
  cor.coef = TRUE, cor.method = "spearman",
  title = "Correlation between Pcintura and
PON1 concentration",
  xlab = "Waist circumference (cm)", ylab =

```

```

"PON1 concentration (mg/L)",
                                legend.title = "none") +
  theme_classic() +
  theme(
    axis.line = element_line(color = "black"),
    axis.text = element_text(size = 12),
    axis.title = element_text(size = 12, face = "bold"),
    aspect.ratio = 1/1
  )

# ARE act
Db_filt <- Db %>%
  filter(complete.cases(ARE_act_2022, Pcintura))
cor_plot_ARE <- ggscatter(Db_filt, x = "Pcintura", y = "ARE_act_2022",
  add = "reg.line", conf.int = TRUE,
  cor.coef = TRUE, cor.method = "spearman",
  title = "Correlation between waist circumference and arylesterase activity",
  xlab = "Waist circumference (cm)", ylab =
"Arylesterase activity (U/L)",
  legend.title = "none") +
  theme_classic() +
  theme(
    axis.line = element_line(color = "black"),
    axis.text = element_text(size = 12),
    axis.title = element_text(size = 12, face = "bold"),
    aspect.ratio = 1/1
  )

# PARX act
Db_filt <- Db %>%
  filter(complete.cases(adj_Paraxonase, Pcintura))
cor_plot_Parax <- ggscatter(Db_filt, x = "Pcintura", y = "adj_Paraxonase",
  add = "reg.line", conf.int = TRUE,
  cor.coef = TRUE, cor.method = "spearman",
  title = "Correlation between waist circumference and Paraxonase activity",
  xlab = "Waist circumference (cm)", ylab =
"Paraxonase activity (U/L)",
  legend.title = "none") +
  theme_classic() +
  theme(
    axis.line = element_line(color = "black"),
    axis.text = element_text(size = 12),
    axis.title = element_text(size = 12, face = "bold"),
    aspect.ratio = 1/1
  )

# LAC act
Db_filt <- Db %>%
  filter(complete.cases(adj_Lactonase, Pcintura))
cor_plot_Lacto <- ggscatter(Db_filt, x = "Pcintura", y = "adj_Lactonase",

```

```

                                add = "reg.line", conf.int = TRUE,
                                cor.coef = TRUE, cor.method = "spearman",
                                title = "Correlation between waist circumf
erence and Lactonase activity",
                                xlab = "Waist circumference (cm)", ylab =
"Lactonase activity (U/L)",
                                legend.title = "none") +

  theme_classic() +
  theme(
    axis.line = element_line(color = "black"),
    axis.text = element_text(size = 12),
    axis.title = element_text(size = 12, face = "bold"),
    aspect.ratio = 1/1
  )

# Save the plots
ggsave(filename = "Raw plots/Obesity/cor2Pcin_PON1c.pdf",
        plot = cor_plot_PON1c,
        device = "pdf",
        height = 2.5,
        width = 2.5)
ggsave(filename = "Raw plots/Obesity/cor2Pcin_are.pdf",
        plot = cor_plot_ARE,
        device = "pdf",
        height = 2.5,
        width = 2.5)
ggsave(filename = "Raw plots/Obesity/cor2Pcin_parax.pdf",
        plot = cor_plot_Parax,
        device = "pdf",
        height = 2.5,
        width = 2.5)
ggsave(filename = "Raw plots/Obesity/cor2Pcin_Lacton.pdf",
        plot = cor_plot_Lacto,
        device = "pdf",
        height = 2.5,
        width = 2.5)

```

## Is hepatic severity related to PON1 concentration and activity?

```

DbNASH <- subset(Db, Db$Group == "Obese")
DbNASH$NAS_qual <- as.factor(DbNASH$NAS_qual)
DbNASH$Steatosis_score <- as.factor(DbNASH$Steatosis_score)
DbNASH$Ballooning <- as.factor(DbNASH$Ballooning)
DbNASH$Inflammation <- as.factor(DbNASH$Inflammation)
table_2 <- CreateTableOne(data = DbNASH, vars = vars, factorVars = cat
vars, strata = "NAS_qual")
print(suppl_table_4, nonnormal = vars, formatOptions = list(big.mark =
","))

```

## PON1 and NASH diagnosis

```

PON1c <- DbNASH %>%
  filter(complete.cases(NAS_qual)) %>%

```

```

ggplot(aes(x = NAS_qual, y = PON1c, fill = NAS_qual)) +
geom_boxplot(outlier.shape=NA, color = "black", size = 0.5) +
stat_compare_means(label = "p", tip.length = 0, size = 4) +
scale_fill_manual(values = c("#fafa6e", "#23aa8f", "#d02a5a")) +
ylim(0, 300) +
xlab("") +
ylab("PON1 concentration (mg/L)") +
theme_classic() +
theme(axis.line = element_line(colour = "black", size = 0.5),
      panel.background = element_rect(fill = "white"),
      panel.grid.major = element_blank(),
      panel.grid.minor = element_blank(),
      axis.text = element_text(size = 12),
      axis.text.x = element_blank(),
      axis.ticks.x = element_blank(),
      axis.title = element_text(size = 14, face = "bold"),
      #legend.position = "none",
      axis.ticks = element_line(colour = "black", size = 0.5),
      aspect.ratio = 2)
ggsave(filename = "Raw plots/Liver/NASqual_pon1c.pdf",
      plot = PON1c,
      device = "pdf",
      height = 3,
      width = 5)

are <- DbNASH %>% filter(complete.cases(Steatosis_score)) %>% ggplot
ot(aes(x = NAS_qual, y = ARE_act_2022, fill = NAS_qual)) +
geom_boxplot(outlier.shape=NA, color = "black", size = 0.5) +
stat_compare_means(label = "p", tip.length = 0, size = 4) +
scale_fill_manual(values = c("#fafa6e", "#23aa8f", "#d02a5a")) +
ylim(0, 300) +
xlab("") +
ylab("Arylesterase activity (U/L)") +
theme_classic() +
theme(axis.line = element_line(colour = "black", size = 0.5),
      panel.background = element_rect(fill = "white"),
      panel.grid.major = element_blank(),
      panel.grid.minor = element_blank(),
      axis.text = element_text(size = 12),
      axis.text.x = element_blank(),
      axis.ticks.x = element_blank(),
      axis.title = element_text(size = 14, face = "bold"),
      #legend.position = "none",
      axis.ticks = element_line(colour = "black", size = 0.5),
      aspect.ratio = 2)
ggsave(filename = "Raw plots/Liver/NASqual_are.pdf",
      plot = are,
      device = "pdf",
      height = 3,
      width = 5)

parax <- DbNASH %>% filter(complete.cases(Steatosis_score)) %>% gg
plot(aes(x = NAS_qual, y = adj_Paraxonase, fill = NAS_qual)) +
geom_boxplot(outlier.shape=NA, color = "black", size = 0.5) +

```



```

stat_compare_means(label = "p", tip.length = 0, size = 4) +
scale_fill_manual(values = c("#fafa6e", "#23aa8f", "#d02a5a")) +
ylim(0, 500) +
xlab("") +
ylab("Paraoxonasae activity (U/L)") +
theme_classic() +
theme(axis.line = element_line(colour = "black", size = 0.5),
      panel.background = element_rect(fill = "white"),
      panel.grid.major = element_blank(),
      panel.grid.minor = element_blank(),
      axis.text = element_text(size = 12),
      axis.text.x = element_blank(),
      axis.ticks.x = element_blank(),
      axis.title = element_text(size = 14, face = "bold"),
      #Legend.position = "none",
      axis.ticks = element_line(colour = "black", size = 0.5),
      aspect.ratio = 2)
ggsave(filename = "Raw plots/Liver/NASqual_parax.pdf",
      plot = parax,
      device = "pdf",
      height = 3,
      width = 5)

lacton <- DbNASH %>% filter(complete.cases(Steatosis_score)) %>% g
ggplot(aes(x = NAS_qual, y = adj_Lactonase, fill = NAS_qual)) +
  geom_boxplot(outlier.shape=NA, color = "black", size = 0.5) +
  stat_compare_means(label = "p", tip.length = 0, size = 4) +
  scale_fill_manual(values = c("#fafa6e", "#23aa8f", "#d02a5a")) +
  ylim(0, 15) +
  xlab("") +
  ylab("Lactonase activity (U/L)") +
  theme_classic() +
  theme(axis.line = element_line(colour = "black", size = 0.5),
        panel.background = element_rect(fill = "white"),
        panel.grid.major = element_blank(),
        panel.grid.minor = element_blank(),
        axis.text = element_text(size = 12),
        axis.text.x = element_blank(),
        axis.ticks.x = element_blank(),
        axis.title = element_text(size = 14, face = "bold"),
        #Legend.position = "none",
        axis.ticks = element_line(colour = "black", size = 0.5),
        aspect.ratio = 2)
ggsave(filename = "Raw plots/Liver/NASqual_lacton.pdf",
      plot = lacton,
      device = "pdf",
      height = 3,
      width = 5)

```

## PON1 and hepatic histological features

*#Definition of hepatic features as categorical variables*

```

DbNASH$Steatosis_score <- as.factor(DbNASH$Steatosis_score)
DbNASH$Inflammation <- as.factor(DbNASH$Inflammation)

```

```
DbNASH$Ballooning <- as.factor(DbNASH$Ballooning)
DbNASH$Fibrosis <- as.factor(DbNASH$Fibrosis)
```

### Steatosis score

```
steat_pon1c <- DbNASH %>% filter(complete.cases(Steatosis_score)) %>%
% ggplot(aes(x = Steatosis_score, y = PON1c, fill = Steatosis_score)
) +
  geom_boxplot(outlier.shape = NA, color = "black", size = 0.5, na.rm
= TRUE) +
  stat_compare_means(label = "p", tip.length = 0, size = 4) +
  scale_fill_manual(values = c("#8ca6bd", "#f6b02c", "#c73647", "#3133
40")) +
  ylim(0, 300) +
  xlab("") +
  ylab("PON1 concentration (mg/L)") +
  theme_classic() +
  theme(axis.line = element_line(colour = "black", size = 0.5),
        panel.background = element_rect(fill = "white"),
        panel.grid.major = element_blank(),
        panel.grid.minor = element_blank(),
        axis.text = element_text(size = 12),
        axis.text.x = element_blank(),
        axis.ticks.x = element_blank(),
        axis.title = element_text(size = 14, face = "bold"),
        #legend.position = "none",
        axis.ticks = element_line(colour = "black", size = 0.5),
        aspect.ratio = 2)
ggsave(filename = "Raw plots/Liver/steat_pon1c.pdf",
        plot = steat_pon1c,
        device = "pdf",
        height = 3,
        width = 5)
```

```
steat_are <- DbNASH %>% filter(complete.cases(Steatosis_score)) %>%
ggplot(aes(x = Steatosis_score, y = ARE_act_2022, fill = Steatosis_sco
re)) +
  geom_boxplot(outlier.shape=NA, color = "black", size = 0.5) +
  stat_compare_means(label = "p", tip.length = 0, size = 4) +
  scale_fill_manual(values = c("#8ca6bd", "#f6b02c", "#c73647", "#3133
40")) +
  ylim(0, 300) +
  xlab("") +
  ylab("Arylesterase activity (U/L)") +
  theme_classic() +
  theme(axis.line = element_line(colour = "black", size = 0.5),
        panel.background = element_rect(fill = "white"),
        panel.grid.major = element_blank(),
        panel.grid.minor = element_blank(),
        axis.text = element_text(size = 12),
        axis.text.x = element_blank(),
        axis.ticks.x = element_blank(),
        axis.title = element_text(size = 14, face = "bold"),
        #legend.position = "none",
        axis.ticks = element_line(colour = "black", size = 0.5),
```

```

    aspect.ratio = 2)
ggsave(filename = "Raw plots/Liver/steat_are.pdf",
       plot = steat_are,
       device = "pdf",
       height = 3,
       width = 5)

steat_parax <- DbNASH %>% filter(complete.cases(Steatosis_score)) %>
% ggplot(aes(x = Steatosis_score, y = adj_Paraxonase, fill = Steatos
is_score)) +
  geom_boxplot(outlier.shape=NA, color = "black", size = 0.5) +
  stat_compare_means(label = "p", tip.length = 0, size = 4) +
  scale_fill_manual(values = c("#8ca6bd", "#f6b02c", "#c73647", "#3133
40")) +
  ylim(0, 500) +
  xlab("") +
  ylab("Paraoxonase activity (U/L)") +
  theme_classic() +
  theme(axis.line = element_line(colour = "black", size = 0.5),
        panel.background = element_rect(fill = "white"),
        panel.grid.major = element_blank(),
        panel.grid.minor = element_blank(),
        axis.text = element_text(size = 12),
        axis.text.x = element_blank(),
        axis.ticks.x = element_blank(),
        axis.title = element_text(size = 14, face = "bold"),
        #legend.position = "none",
        axis.ticks = element_line(colour = "black", size = 0.5),
        aspect.ratio = 2)
ggsave(filename = "Raw plots/Liver/steat_parax.pdf",
       plot = steat_parax,
       device = "pdf",
       height = 3,
       width = 5)

steat_lacton <- DbNASH %>% filter(complete.cases(Steatosis_score)) %
>% ggplot(aes(x = Steatosis_score, y = adj_Lactonase, fill = Steatos
is_score)) +
  geom_boxplot(outlier.shape=NA, color = "black", size = 0.5) +
  stat_compare_means(label = "p", tip.length = 0, size = 4) +
  scale_fill_manual(values = c("#8ca6bd", "#f6b02c", "#c73647", "#3133
40")) +
  ylim(0, 15) +
  xlab("") +
  ylab("Lactonase activity (U/L)") +
  theme_classic() +
  theme(axis.line = element_line(colour = "black", size = 0.5),
        panel.background = element_rect(fill = "white"),
        panel.grid.major = element_blank(),
        panel.grid.minor = element_blank(),
        axis.text = element_text(size = 12),
        axis.text.x = element_blank(),
        axis.ticks.x = element_blank(),
        axis.title = element_text(size = 14, face = "bold"),

```

```

    #legend.position = "none",
    axis.ticks = element_line(colour = "black", size = 0.5),
    aspect.ratio = 2)
ggsave(filename = "Raw plots/Liver/steat_lacton.pdf",
plot = steat_lacton,
device = "pdf",
height = 3,
width = 5)

```

### Steatosis grade

```

# Filter data and calculate correlations with tie handling
Db_filt <- DbNASH %>%
  filter(complete.cases(Steatosis_grade))

cor_result_PON1c <- cor.test(Db_filt$PON1c, Db_filt$Steatosis_grade, m
method = "spearman", exact = FALSE)
cor_result_ARE <- cor.test(Db_filt$ARE_act_2022, Db_filt$Steatosis_gra
de, method = "spearman", exact = FALSE)
cor_result_Parax <- cor.test(Db_filt$adj_Paraxonase, Db_filt$Steatosis
_grade, method = "spearman", exact = FALSE)
cor_result_Lacto <- cor.test(Db_filt$adj_Lactonase, Db_filt$Steatosis_
grade, method = "spearman", exact = FALSE)

# Create correlation plots
cor_plot_PON1c <- ggscatter(Db_filt, x = "Steatosis_grade", y = "PON1c
",
                        add = "reg.line", conf.int = TRUE,
                        cor.coef = TRUE, cor.method = "spearman",
                        title = "Correlation between steatosis gra
de and PON1 concentration",
                        xlab = "Steatosis grade (%)", ylab = "PON1
concentration (mg/L)",
                        legend.title = paste("rho =", round(cor_re
sult_PON1c$estimate, 2),
                        "p =", format(cor_res
ult_PON1c$p.value, digits = 4)),
                        legend = "bottom", legend.params = list(co
lor = "red")) +
  theme_classic() +
  theme(
    axis.line = element_line(color = "black"),
    axis.text = element_text(size = 12),
    axis.title = element_text(size = 12, face = "bold"),
    legend.position = "none"
  )

cor_plot_ARE <- ggscatter(Db_filt, x = "Steatosis_grade", y = "ARE_act
_2022",
                        add = "reg.line", conf.int = TRUE,
                        cor.coef = TRUE, cor.method = "spearman",
                        title = "Correlation between steatosis grade
and Arylesterease activity",
                        xlab = "Steatosis grade (%)", ylab = "Aryles
terase activity (U/L)",

```

```

                                legend.title = paste("rho =", round(cor_resu
lt_ARE$estimate, 2),
                                "p =", format(cor_resul
t_ARE$p.value, digits = 4)),
                                legend = "bottom", legend.params = list(colo
r = "red")) +
  theme_classic() +
  theme(
    axis.line = element_line(color = "black"),
    axis.text = element_text(size = 12),
    axis.title = element_text(size = 12, face = "bold"),
    legend.position = "none"
  )

cor_plot_Parax <- ggscatter(Db_filt, x = "Steatosis_grade", y = "adj_P
araxonase",
                                add = "reg.line", conf.int = TRUE,
                                cor.coef = TRUE, cor.method = "spearman",
                                title = "Correlation between steatosis gra
de and Paraoxonase activity",
                                xlab = "Steatosis grade (%)", ylab = "Para
oxonasae activity (U/L)",
                                legend.title = paste("rho =", round(cor_re
sult_Parax$estimate, 2),
                                "p =", format(cor_res
ult_Parax$p.value, digits = 4)),
                                legend = "bottom", legend.params = list(co
lor = "red")) +
  theme_classic() +
  theme(
    axis.line = element_line(color = "black"),
    axis.text = element_text(size = 12),
    axis.title = element_text(size = 12, face = "bold"),
    legend.position = "none"
  )

cor_plot_Lacto <- ggscatter(Db_filt, x = "Steatosis_grade", y = "adj_L
actonase",
                                add = "reg.line", conf.int = TRUE,
                                cor.coef = TRUE, cor.method = "spearman",
                                title = "Correlation between steatosis grade and adj_Lactona
se activity",
                                xlab = "Steatosis grade (%)", ylab = "Lactonase activity (U/
L)",
                                legend.title = paste("rho =", round(cor_result_Lacto$estimat
e, 2),
                                "p =", format(cor_result_Lacto$p.value,
digits = 4)),
                                legend = "bottom", legend.params = list(color = "red")) +
  theme_classic() +
  theme(
    axis.line = element_line(color = "black"),
    axis.text = element_text(size = 12),
    axis.title = element_text(size = 12, face = "bold"),

```

```

    legend.position = "none"
  )
# Save the plots
ggsave(filename = "Raw plots/Liver/corSteat_PON1c.pdf",
        plot = cor_plot_PON1c,
        device = "pdf",
        height = 3.2,
        width = 5.2)
ggsave(filename = "Raw plots/Liver/corSteat_are.pdf",
        plot = cor_plot_ARE,
        device = "pdf",
        height = 3.2,
        width = 5.2)
ggsave(filename = "Raw plots/Liver/corSteat_parax.pdf",
        plot = cor_plot_Parax,
        device = "pdf",
        height = 3.2,
        width = 5.2)
ggsave(filename = "Raw plots/Liver/corSteat_Lacton.pdf",
        plot = cor_plot_Lacton,
        device = "pdf",
        height = 3.2,
        width = 5.2)

```

### Lobular inflammation

```

infl_pon1c <- DbNASH %>% filter(complete.cases(Inflammation)) %>%
ggplot(aes(x = Inflammation, y = PON1c, fill = Inflammation)) +
  geom_boxplot(outlier.shape=NA, color = "black", size = 0.5) +
  stat_compare_means(label = "p", tip.length = 0, size = 4) +
  scale_fill_manual(values = c("#FFB500", "#FFDA13", "#5F7CA1", "#2735
50")) +
  ylim(0, 300) +
  xlab("") +
  ylab("PON1 concentration (mg/L)") +
  theme_classic() +
  theme(axis.line = element_line(colour = "black", size = 0.5),
        panel.background = element_rect(fill = "white"),
        panel.grid.major = element_blank(),
        panel.grid.minor = element_blank(),
        axis.text = element_text(size = 12),
        axis.text.x = element_blank(),
        axis.ticks.x = element_blank(),
        axis.title = element_text(size = 14, face = "bold"),
        #legend.position = "none",
        axis.ticks = element_line(colour = "black", size = 0.5),
        aspect.ratio = 2)
ggsave(filename = "Raw plots/Liver/infl_pon1c.pdf",
        plot = infl_pon1c,
        device = "pdf",
        height = 3,
        width = 5)

infl_are <- DbNASH %>% filter(complete.cases(Inflammation)) %>% gg
plot(aes(x = Inflammation, y = ARE_act_2022, fill = Inflammation)) +

```

```

geom_boxplot(outlier.shape=NA, color = "black", size = 0.5) +
#geom_point() +
stat_compare_means(label = "p", tip.length = 0, size = 4) +
scale_fill_manual(values = c("#FFB500", "#FFDA13", "#5F7CA1", "#2735
50")) +
ylim(0, 300) +
xlab("") +
ylab("Arylesterase activity (U/L)") +
theme_classic() +
theme(axis.line = element_line(colour = "black", size = 0.5),
      panel.background = element_rect(fill = "white"),
      panel.grid.major = element_blank(),
      panel.grid.minor = element_blank(),
      axis.text = element_text(size = 12),
      axis.text.x = element_blank(),
      axis.ticks.x = element_blank(),
      axis.title = element_text(size = 14, face = "bold"),
      #legend.position = "none",
      axis.ticks = element_line(colour = "black", size = 0.5),
      aspect.ratio = 2)
ggsave(filename = "Raw plots/Liver/infl_are.pdf",
      plot = infl_are,
      device = "pdf",
      height = 3,
      width = 5)

infl_parax <- DbNASH %>% filter(complete.cases(Inflammation)) %>%
ggplot(aes(x = Inflammation, y = adj_Paraxonase, fill = Inflammation))
+
geom_boxplot(outlier.shape=NA, color = "black", size = 0.5) +
stat_compare_means(label = "p", tip.length = 0, size = 4) +
scale_fill_manual(values = c("#FFB500", "#FFDA13", "#5F7CA1", "#2735
50")) +
ylim(0, 500) +
xlab("") +
ylab("Paraoxonasae activity (U/L)") +
theme_classic() +
theme(axis.line = element_line(colour = "black", size = 0.5),
      panel.background = element_rect(fill = "white"),
      panel.grid.major = element_blank(),
      panel.grid.minor = element_blank(),
      axis.text = element_text(size = 12),
      axis.text.x = element_blank(),
      axis.ticks.x = element_blank(),
      axis.title = element_text(size = 14, face = "bold"),
      #legend.position = "none",
      axis.ticks = element_line(colour = "black", size = 0.5),
      aspect.ratio = 2)
ggsave(filename = "Raw plots/Liver/infl_parax.pdf",
      plot = infl_parax,
      device = "pdf",
      height = 3,
      width = 5)

```



```

infl_lacton <- DbNASH %>% filter(complete.cases(Inflammation)) %>%
ggplot(aes(x = Inflammation, y = adj_Lactonase, fill = Inflammation))
+
  geom_boxplot(outlier.shape=NA, color = "black", size = 0.5) +
  stat_compare_means(label = "p", tip.length = 0, size = 4) +
  scale_fill_manual(values = c("#FFB500", "#FFDA13", "#5F7CA1", "#2735
50")) +
  ylim(0, 15) +
  xlab("") +
  ylab("Lactonase activity (U/L)") +
  theme_classic() +
  theme(axis.line = element_line(colour = "black", size = 0.5),
        panel.background = element_rect(fill = "white"),
        panel.grid.major = element_blank(),
        panel.grid.minor = element_blank(),
        axis.text = element_text(size = 12),
        axis.text.x = element_blank(),
        axis.ticks.x = element_blank(),
        axis.title = element_text(size = 14, face = "bold"),
        #Legend.position = "none",
        axis.ticks = element_line(colour = "black", size = 0.5),
        aspect.ratio = 2)
ggsave(filename = "Raw plots/Liver/infl_lacton.pdf",
        plot = infl_lacton,
        device = "pdf",
        height = 3,
        width = 5)

```

## Ballooning

```

ballo_pon1c <- DbNASH %>% filter(complete.cases(Ballooning)) %>% g
gplot(aes(x = Ballooning, y = PON1c, fill = Ballooning)) +
  geom_boxplot(outlier.shape=NA, color = "black", size = 0.5) +
  stat_compare_means(label = "p", tip.length = 0, size = 4) +
  scale_fill_manual(values = c("#653040", "#dfdcd7", "#6b9fc6")) +
  ylim(0, 300) +
  xlab("") +
  ylab("PON1 concentration (mg/L)") +
  theme_classic() +
  theme(axis.line = element_line(colour = "black", size = 0.5),
        panel.background = element_rect(fill = "white"),
        panel.grid.major = element_blank(),
        panel.grid.minor = element_blank(),
        axis.text = element_text(size = 12),
        axis.text.x = element_blank(),
        axis.ticks.x = element_blank(),
        axis.title = element_text(size = 14, face = "bold"),
        #Legend.position = "none",
        axis.ticks = element_line(colour = "black", size = 0.5),
        aspect.ratio = 2)
ggsave(filename = "Raw plots/Liver/ballo_pon1c.pdf",
        plot = ballo_pon1c,
        device = "pdf",
        height = 3,
        width = 5)

```



```
ballo_are <- DbNASH %>% filter(complete.cases(Ballooning)) %>% ggp
lot(aes(x = Ballooning, y = ARE_act_2022, fill = Ballooning)) +
  geom_boxplot(outlier.shape=NA, color = "black", size = 0.5) +
  #geom_point() +
  stat_compare_means(label = "p", tip.length = 0, size = 4) +
  scale_fill_manual(values = c("#653040", "#dfdcd7", "#6b9fc6")) +
  ylim(0, 300) +
  xlab("") +
  ylab("Arylesterase activity (U/L)") +
  theme_classic() +
  theme(axis.line = element_line(colour = "black", size = 0.5),
        panel.background = element_rect(fill = "white"),
        panel.grid.major = element_blank(),
        panel.grid.minor = element_blank(),
        axis.text = element_text(size = 12),
        axis.text.x = element_blank(),
        axis.ticks.x = element_blank(),
        axis.title = element_text(size = 14, face = "bold"),
        #legend.position = "none",
        axis.ticks = element_line(colour = "black", size = 0.5),
        aspect.ratio = 2)
ggsave(filename = "Raw plots/Liver/ballo_are.pdf",
        plot = ballo_are,
        device = "pdf",
        height = 3,
        width = 5)
```

```
ballo_parax <- DbNASH %>% filter(complete.cases(Ballooning)) %>% g
gplot(aes(x = Ballooning, y = adj_Paraxonase, fill = Ballooning)) +
  geom_boxplot(outlier.shape=NA, color = "black", size = 0.5) +
  stat_compare_means(label = "p", tip.length = 0, size = 4) +
  scale_fill_manual(values = c("#653040", "#dfdcd7", "#6b9fc6")) +
  ylim(0, 500) +
  xlab("") +
  ylab("Paraoxonasae activity (U/L)") +
  theme_classic() +
  theme(axis.line = element_line(colour = "black", size = 0.5),
        panel.background = element_rect(fill = "white"),
        panel.grid.major = element_blank(),
        panel.grid.minor = element_blank(),
        axis.text = element_text(size = 12),
        axis.text.x = element_blank(),
        axis.ticks.x = element_blank(),
        axis.title = element_text(size = 14, face = "bold"),
        #legend.position = "none",
        axis.ticks = element_line(colour = "black", size = 0.5),
        aspect.ratio = 2)
ggsave(filename = "Raw plots/Liver/ballo_parax.pdf",
        plot = ballo_parax,
        device = "pdf",
        height = 3,
        width = 5)
```

```
ballo_lacto <- DbNASH %>% filter(complete.cases(Ballooning)) %>% ggplot(aes(x = Ballooning, y = adj_Lactonase, fill = Ballooning)) +
  geom_boxplot(outlier.shape=NA, color = "black", size = 0.5) +
  stat_compare_means(label = "p", tip.length = 0, size = 4) +
  scale_fill_manual(values = c("#653040", "#dfdcd7", "#6b9fc6")) +
  ylim(0, 15) +
  xlab("") +
  ylab("Lactonase activity (U/L)") +
  theme_classic() +
  theme(axis.line = element_line(colour = "black", size = 0.5),
        panel.background = element_rect(fill = "white"),
        panel.grid.major = element_blank(),
        panel.grid.minor = element_blank(),
        axis.text = element_text(size = 12),
        axis.text.x = element_blank(),
        axis.ticks.x = element_blank(),
        axis.title = element_text(size = 14, face = "bold"),
        #legend.position = "none",
        axis.ticks = element_line(colour = "black", size = 0.5),
        aspect.ratio = 2)
ggsave(filename = "Raw plots/Liver/ballo_lacto.pdf",
        plot = ballo_lacto,
        device = "pdf",
        height = 3,
        width = 5)
```

## Fibrosis

```
fibr_pon1c <- DbNASH %>% filter(complete.cases(Fibrosis)) %>% ggplot(aes(x = Fibrosis, y = PON1c, fill = Fibrosis)) +
  geom_boxplot(outlier.shape=NA, color = "black", size = 0.5) +
  stat_compare_means(label = "p", tip.length = 0, size = 4) +
  scale_fill_manual(values = c("#d42c7d", "#fbe1ae", "#84c922", "#eaeaea", "#ff4f00")) +
  ylim(0, 300) +
  xlab("") +
  ylab("PON1 concentration (mg/L)") +
  theme_classic() +
  theme(axis.line = element_line(colour = "black", size = 0.5),
        panel.background = element_rect(fill = "white"),
        panel.grid.major = element_blank(),
        panel.grid.minor = element_blank(),
        axis.text = element_text(size = 12),
        axis.text.x = element_blank(),
        axis.ticks.x = element_blank(),
        axis.title = element_text(size = 14, face = "bold"),
        #legend.position = "none",
        axis.ticks = element_line(colour = "black", size = 0.5),
        aspect.ratio = 2)
ggsave(filename = "Raw plots/Liver/fibr_pon1c.pdf",
        plot = fibr_pon1c,
        device = "pdf",
        height = 3,
        width = 5)
```

```
fibr_are <- DbNASH %>% filter(complete.cases(Fibrosis)) %>% ggplot
(aes(x = Fibrosis, y = ARE_act_2022, fill = Fibrosis)) +
  geom_boxplot(outlier.shape=NA, color = "black", size = 0.5) +
  stat_compare_means(label = "p", tip.length = 0, size = 4) +
  scale_fill_manual(values = c("#d42c7d", "#fbe1ae", "#84c922", "#eaea
ea", "#ff4f00")) +
  ylim(0, 300) +
  xlab("") +
  ylab("Arylesterase activity (U/L)") +
  theme_classic() +
  theme(axis.line = element_line(colour = "black", size = 0.5),
        panel.background = element_rect(fill = "white"),
        panel.grid.major = element_blank(),
        panel.grid.minor = element_blank(),
        axis.text = element_text(size = 12),
        axis.text.x = element_blank(),
        axis.ticks.x = element_blank(),
        axis.title = element_text(size = 14, face = "bold"),
        #legend.position = "none",
        axis.ticks = element_line(colour = "black", size = 0.5),
        aspect.ratio = 2)
ggsave(filename = "Raw plots/Liver/fibr_are.pdf",
        plot = fibr_are,
        device = "pdf",
        height = 3,
        width = 5)
```

```
fibr_parax <- DbNASH %>% filter(complete.cases(Fibrosis)) %>% ggplot
(aes(x = Fibrosis, y = adj_Paraxonase, fill = Fibrosis)) +
  geom_boxplot(outlier.shape=NA, color = "black", size = 0.5) +
  #geom_point() +
  stat_compare_means(label = "p", tip.length = 0, size = 4) +
  scale_fill_manual(values = c("#d42c7d", "#fbe1ae", "#84c922", "#eaea
ea", "#ff4f00")) +
  ylim(0, 500) +
  xlab("") +
  ylab("Paraoxonase activity (U/L)") +
  theme_classic() +
  theme(axis.line = element_line(colour = "black", size = 0.5),
        panel.background = element_rect(fill = "white"),
        panel.grid.major = element_blank(),
        panel.grid.minor = element_blank(),
        axis.text = element_text(size = 12),
        axis.text.x = element_blank(),
        axis.ticks.x = element_blank(),
        axis.title = element_text(size = 14, face = "bold"),
        #legend.position = "none",
        axis.ticks = element_line(colour = "black", size = 0.5),
        aspect.ratio = 2)
ggsave(filename = "Raw plots/Liver/fibr_parax.pdf",
        plot = fibr_parax,
        device = "pdf",
        height = 3,
        width = 5)
```

```
fibr_lacto <- DbNASH %>% filter(complete.cases(Fibrosis)) %>% ggplot(
  aes(x = Fibrosis, y = adj_Lactonase, fill = Fibrosis)) +
  geom_boxplot(outlier.shape=NA, color = "black", size = 0.5) +
  stat_compare_means(label = "p", tip.length = 0, size = 4) +
  scale_fill_manual(values = c("#d42c7d", "#fbe1ae", "#84c922", "#eaea
ea", "#ff4f00")) +
  ylim(0, 15) +
  xlab("") +
  ylab("Lactonase activity (U/L)") +
  theme_classic() +
  theme(axis.line = element_line(colour = "black", size = 0.5),
        panel.background = element_rect(fill = "white"),
        panel.grid.major = element_blank(),
        panel.grid.minor = element_blank(),
        axis.text = element_text(size = 12),
        axis.text.x = element_blank(),
        axis.ticks.x = element_blank(),
        axis.title = element_text(size = 14, face = "bold"),
        #legend.position = "none",
        axis.ticks = element_line(colour = "black", size = 0.5),
        aspect.ratio = 2)
ggsave(filename = "Raw plots/Liver/fibr_lacto.pdf",
        plot = fibr_lacto,
        device = "pdf",
        height = 3,
        width = 5)
```

## Biomarker

The final ROC plots were created with Metaboanalyst ([www.metaboanalyst.ca](http://www.metaboanalyst.ca)).

```
# Create a binary outcome variable
Db$NASH_binary <- ifelse(Db$NAS_qual == 2, 1, 0)

pon1vars <- c("PON1c", "ARE_act_2022", "adj_Paraxonase", "adj_Lactonase")

roc_list <- lapply(pon1vars, function(var) {
  roc(Db$NASH_binary ~ Db[[var]], data = Db)
})

plot.roc(roc_list[[1]], main="ROC Curves for pon1vars")
sapply(2:length(pon1vars), function(i) {
  lines.roc(roc_list[[i]], col=i)
})
legend("bottomright", legend=pon1vars, col=1:length(pon1vars), lwd=2)

sapply(roc_list, auc)
```

## PON1 polymorphism

### Distribution

```
# Variable name change to avoid hyphen
names(Db)[names(Db) == "PON1-rs662-2022"] <- "PON1_polim"
Db <- Db %>%
  drop_na(`PON1_polim`)
```

### All participants

```
group_totals <- Db %>%
  filter(!is.na(PON1_polim)) %>%
  dplyr::group_by(Group) %>%
  dplyr::summarise(total = n())

Db_percent <- Db %>%
  dplyr::group_by(PON1_polim, Group) %>%
  dplyr::summarise(count = n()) %>%
  dplyr::left_join(group_totals, by = "Group") %>%
  dplyr::mutate(percentage = (count / total) * 100)

gen_distr <- ggplot(data = Db_percent, aes(x = PON1_polim, y = percent
age, fill = Group)) +
  geom_col(position = "dodge", color = "black", alpha = 0.8) +
  labs(x = "PON1 polymorphism (rs662)", y = "Frequency (%)") +
  theme_minimal() +
  theme(
    plot.title = element_text(size = 16, face = "bold"),
    axis.text = element_text(size = 12),
    axis.title = element_text(size = 14, face = "bold"),
    panel.grid.major = element_blank(),
    panel.grid.minor = element_blank(),
    panel.background = element_blank(),
    axis.line = element_line(color = "black"),
    axis.ticks.x = element_blank(),
    aspect.ratio = 1.2/1
  )

ggsave(filename = "Raw plots/Genotypes/Distributiontotal.pdf",
  plot = gen_distr,
  device = "pdf",
  height = 3.2,
  width = 3.2)

gen_distr_g <- ggplot(data = Db, aes(x = PON1_polim, fill = Group)) +
  geom_bar(position = "fill", color = "black", alpha = 0.8) +
  labs(x = "PON1 polymorphism (rs662)", y = "Proportion of Participant
s") +
  theme_minimal() +
  theme(
    plot.title = element_text(size = 16, face = "bold"),
    axis.text = element_text(size = 12),
    axis.title = element_text(size = 14, face = "bold"),
    panel.grid.major = element_blank(),
    panel.grid.minor = element_blank(),
```

```

    panel.background = element_blank(),
    axis.line = element_line(color = "black"),
    axis.ticks.x = element_blank(),
    aspect.ratio = 1/0.7,
  )
ggsave(filename = "Raw plots/Genotypes/Frequency_gen_grouped.pdf",
       plot = gen_distr_g,
       device = "pdf",
       height = 3.2,
       width = 3.2)

contingency_table <- table(Db$PON1_polim, Db$Group)

chi2_test <- chisq.test(contingency_table)

print(chi2_test)

nas_totals <- Db %>%
  filter(!is.na(NAS_qual) & !is.na(PON1_polim)) %>%
  dplyr::group_by(NAS_qual) %>%
  dplyr::summarise(total = n())

Db_percent_NAS <- Db %>%
  filter(!is.na(NAS_qual) & !is.na(PON1_polim)) %>%
  dplyr::group_by(PON1_polim, NAS_qual) %>%
  dplyr::summarise(count = n()) %>%
  dplyr::left_join(nas_totals, by = "NAS_qual") %>%
  dplyr::mutate(percentage = (count / total) * 100) %>%
  dplyr::select(-total) # to remove the total column

Db_percent_NAS$NAS_qual <- as.factor(Db_percent_NAS$NAS_qual)

gen_distr_NASH <- ggplot(data = Db_percent_NAS, aes(x = PON1_polim, y
= percentage, fill = NAS_qual)) +
  geom_col(position = "dodge", color = "black", alpha = 0.8) +
  labs(x = "PON1 polymorphism (rs662)", y = "Percentage (%)") +
  theme_minimal() +
  theme(
    plot.title = element_text(size = 16, face = "bold"),
    axis.text = element_text(size = 12),
    axis.title = element_text(size = 14, face = "bold"),
    panel.grid.major = element_blank(),
    panel.grid.minor = element_blank(),
    panel.background = element_blank(),
    axis.line = element_line(color = "black"),
    axis.ticks.x = element_blank(),
    aspect.ratio = 1.2/1
  )

ggsave(filename = "Raw plots/Genotypes/DistributionNASH.pdf",
       plot = gen_distr_NASH,
       device = "pdf",
       height = 3.2,
       width = 3.2)

```

```
contingency_table <- table(Db$PON1_polim, Db$NAS_qual)

chi2_test <- chisq.test(contingency_table)

print(chi2_test)
```

## PON1 polymorphism, concentration and activity

```
stat.test <- Db %>%
  group_by(Group) %>%
  t_test(PON1c ~ PON1_polim) %>%
  adjust_pvalue(method = "bonferroni") %>%
  add_significance("p.adj")
stat.test
stat.test <- stat.test %>%
  add_xy_position(x = "Group", dodge = 0.8)
gen_pon1c <- ggplot(Db, aes(x = Group, y = PON1c, color = PON1_polim))
+
  geom_boxplot(outlier.shape=NA) +
  stat_pvalue_manual(stat.test, label = "p", tip.length = 0) +
  theme(
    axis.line = element_line(color = "black"),
    panel.background = element_blank(),
    panel.grid = element_blank(),
    axis.text = element_text(size = 10, color = "black"),
    legend.key = element_blank(),
    aspect.ratio = 1.3/1) +
  ylim(0,300)
ggsave(filename = "Raw plots/Genotypes/Gen_pon1c.pdf",
  plot = gen_pon1c,
  device = "pdf",
  height = 3.5,
  width = 3.5)

stat.test <- Db %>%
  group_by(Group) %>%
  t_test(ARE_act_2022 ~ PON1_polim) %>%
  adjust_pvalue(method = "bonferroni") %>%
  add_significance("p.adj")
stat.test
stat.test <- stat.test %>%
  add_xy_position(x = "Group", dodge = 0.8)
gen_are <- ggplot(Db, aes(x = Group, y = ARE_act_2022, color = PON1_po
lim)) +
  geom_boxplot(outlier.shape=NA) +
  geom_point(alpha=0.5) +
  stat_pvalue_manual(stat.test, label = "p", tip.length = 0) +
  theme(
    axis.line = element_line(color = "black"),
    panel.background = element_blank(),
    panel.grid = element_blank(),
    axis.text = element_text(size = 10, color = "black"),
    legend.key = element_blank(),
    aspect.ratio = 1.3/1)
```

```

ggsave(filename = "Raw plots/Genotypes/Gen_are.pdf",
        plot = gen_are,
        device = "pdf",
        height = 3.5,
        width = 3.5)

stat.test <- Db %>%
  group_by(Group) %>%
  t_test(adj_Paraxonase ~ PON1_polim) %>%
  adjust_pvalue(method = "bonferroni") %>%
  add_significance("p.adj")
stat.test
stat.test <- stat.test %>%
  add_xy_position(x = "Group", dodge = 0.8)
gen_parax <- ggplot(Db, aes(x = Group, y = adj_Paraxonase, color = PON
1_polim)) +
  geom_boxplot(outlier.shape=NA) +
  stat_pvalue_manual(stat.test, label = "p", tip.length = 0) +
  theme(
    axis.line = element_line(color = "black"),
    panel.background = element_blank(),
    panel.grid = element_blank(),
    axis.text = element_text(size = 10, color = "black"),
    legend.key = element_blank(),
    aspect.ratio = 1.3/1)
ggsave(filename = "Raw plots/Genotypes/Gen_parax.pdf",
        plot = gen_parax,
        device = "pdf",
        height = 3.5,
        width = 3.5)

stat.test <- Db %>%
  group_by(Group) %>%
  t_test(adj_Lactonase ~ PON1_polim) %>%
  adjust_pvalue(method = "bonferroni") %>%
  add_significance("p.adj")
stat.test
stat.test <- stat.test %>%
  add_xy_position(x = "Group", dodge = 0.8)
gen_lacton <- ggplot(Db, aes(x = Group, y = adj_Lactonase, color = PON
1_polim)) +
  geom_boxplot(outlier.shape=NA) +
  stat_pvalue_manual(stat.test, label = "p", tip.length = 0) +
  theme(
    axis.line = element_line(color = "black"),
    panel.background = element_blank(),
    panel.grid = element_blank(),
    axis.text = element_text(size = 10, color = "black"),
    legend.key = element_blank(),
    aspect.ratio = 1.3/1)
ggsave(filename = "Raw plots/Genotypes/Gen_lacton.pdf",
        plot = gen_lacton,
        device = "pdf",

```



```
height = 3.5,  
width = 3.5)
```

**Table S2.** P-values from Shapiro-Wilk normality test for PON1-related variables.

|                       | <b>p-value</b> |
|-----------------------|----------------|
| PON1 concentration    | < 0.001        |
| Arylesterase activity | < 0.001        |
| Paraoxonase activity  | < 0.001        |
| Lactonase activity    | 0.656          |

**Table S3.** Age and sex were tested as confounding factors for PON1-related variables.

|                       | <b>Age</b>     |            | <b>Sex</b>     |                  |
|-----------------------|----------------|------------|----------------|------------------|
|                       | <b>p-value</b> | <b>Rho</b> | <b>p-value</b> | <b>Statistic</b> |
| PON1 concentration    | 0.818          | 0.07       | 0.215          | 119640.5         |
| Arylesterase activity | 0.790          | -0.01      | 0.130          | 151785.0         |
| Paraoxonase activity  | 0.115          | -0.02      | 0.011          | 188477.0         |
| Lactonase activity    | 0.003          | -0.09      | 0.224          | 119402.0         |

Spearman's rho measures the strength and direction of the association between the two continuous variables. Statistic is the W statistic from the Wilcoxon test, which is a rank sum.

**Table S4.** Linear regression analysis showing the relationship between PON1 variables and metabolic syndrome, type 2 diabetes mellitus, hypertension, and dyslipidemia as a set.

|                       | <b>Estimate</b> | <b>Std error</b> | <b>p-value</b> | <b>r-squared</b> |
|-----------------------|-----------------|------------------|----------------|------------------|
| PON1 concentration    | 0.03            | 0.11             | 0.80           | 0.01             |
| Arylesterase activity | 0.01            | 0.02             | 0.80           | 0.12             |
| Paraoxonase activity  | 0.01            | 0.04             | 0.74           | 0.14             |
| Lactonase activity    | 0.00            | 0.00             | 0.80           | 0.17             |

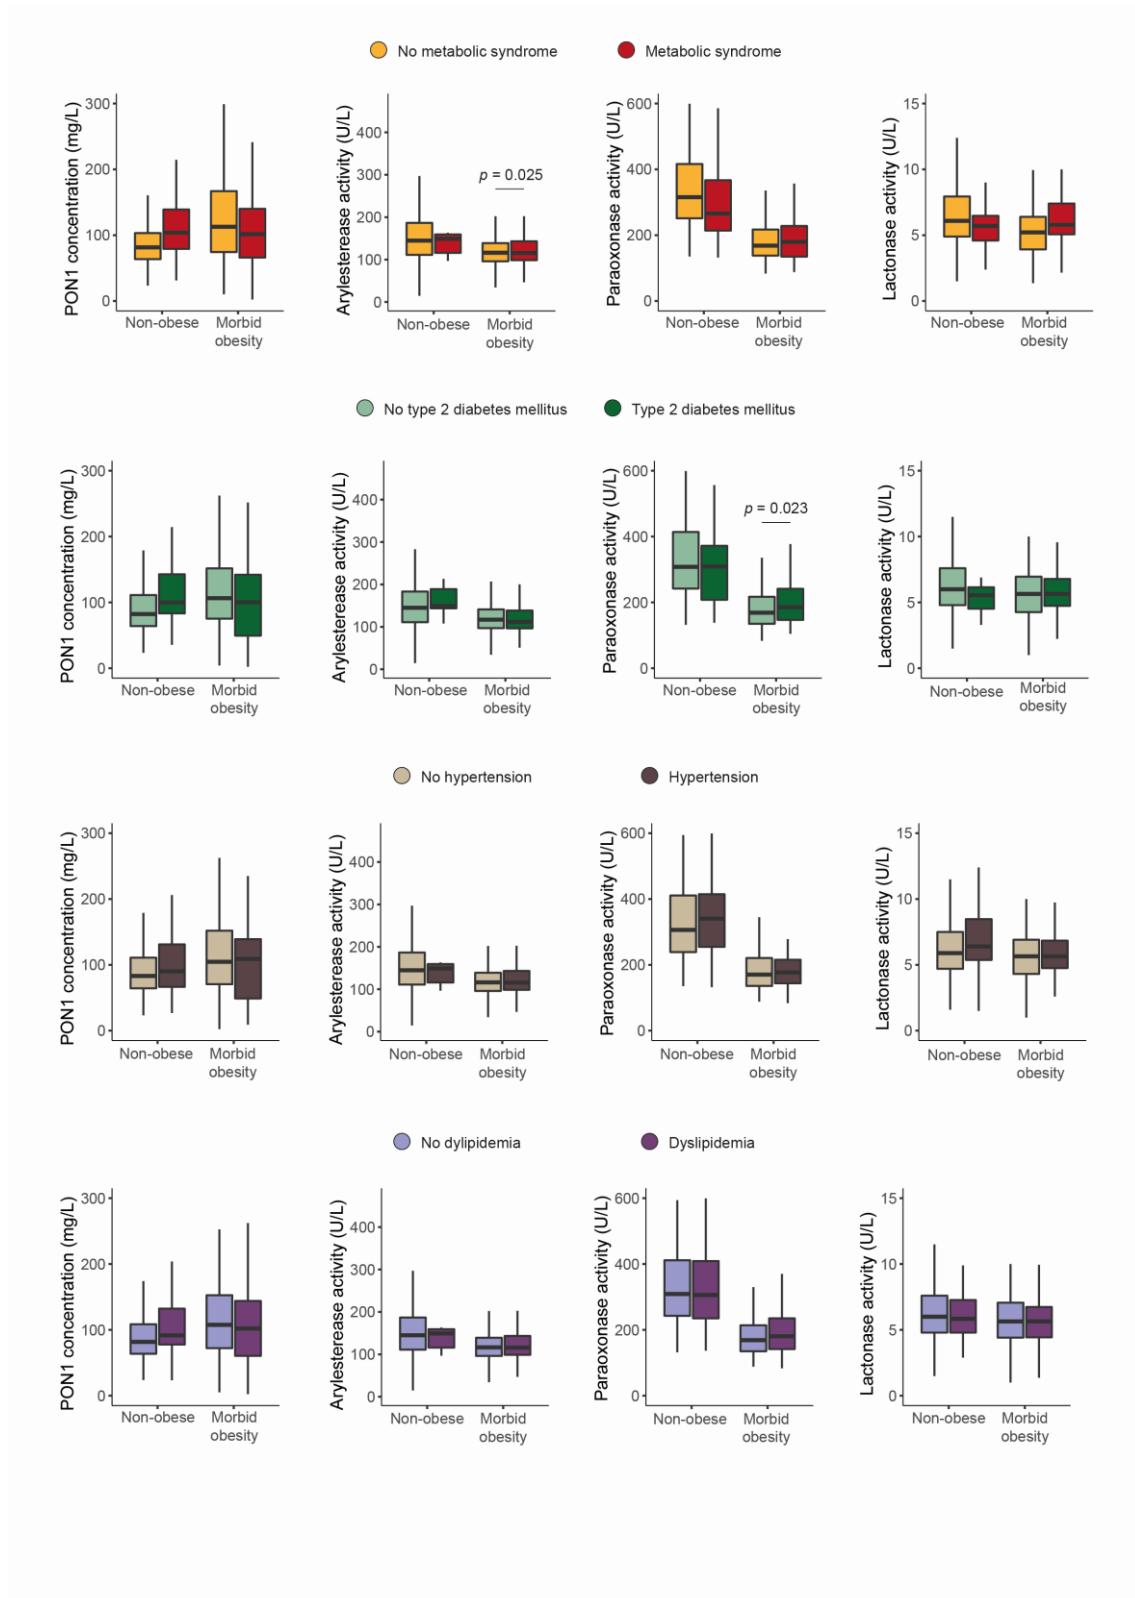

**Figure S1.** Paraoxonase-1 (PON1)-related variables in non-obese individuals and morbidly obese patients segregated according to comorbidities.

**Table S5.** Clinical, analytical, and histological characteristics of morbidly obese patients and different degrees of liver severity.

|                             | <b>Non-NASH<br/>(n=347)</b> | <b>Uncertain NASH<br/>(n=311)</b> | <b>NASH<br/>(n=173)</b> | <b>p-value</b> |
|-----------------------------|-----------------------------|-----------------------------------|-------------------------|----------------|
| Female sex, n (%)           | 258 (74.4)                  | 217 (70.0)                        | 131 (75.7)              | 0.303          |
| Age (years)                 | 48 (40 - 55)                | 50 (42 - 56)                      | 49 (41 - 57)            | 0.121          |
| BMI (kg/m <sup>2</sup> )    | 44.5 (40.9 - 48.9)          | 44.6 (40.9 - 48.8)                | 43.3 (40.3 - 48.6)      | 0.479          |
| Waist circumference (cm)    | 132 (122 - 142)             | 130 (121 - 140)                   | 130 (121 - 140)         | 0.731          |
| T2DM (n (%))                | 85 (24.5)                   | 81 (26.0)                         | 44 (25.4)               | 0.900          |
| HT (n (%))                  | 144 (41.5)                  | 133 (42.8)                        | 73 (42.2)               | 0.947          |
| DLP (n (%))                 | 70 (20.2)                   | 82 (26.4)                         | 44 (25.4)               | 0.142          |
| Metabolic syndrome (n (%))  | 145 (41.8)                  | 122 (39.2)                        | 70 (40.5)               | 0.800          |
| Glucose (mmol/L)            | 6.6 (5.5 - 8.3)             | 6.9 (5.7 - 8.5)                   | 6.8 (5.5 - 8.2)         | 0.288          |
| Insulin (pmol/L)            | 67.2 (36.2 - 125)           | 75.5 (46.1 - 124.9)               | 61.1 (37.5 - 104.2)     | 0.068          |
| HOMA-IR                     | 3.1 (1.5 - 6.3)             | 3.5 (2 - 6)                       | 3 (1.7 - 4.9)           | 0.119          |
| Triglycerides (mmol/L)      | 1.4 (1.1 - 2)               | 1.5 (1.2 - 2)                     | 1.6 (1.2 - 2)           | 0.676          |
| Total cholesterol (mmol/L)  | 4.1 (3.5 - 4.7)             | 4.1 (3.5 - 4.8)                   | 4 (3.6 - 4.7)           | 0.999          |
| HDL cholesterol (mmol/L)    | 1 (0.8 - 1.2)               | 1 (0.8 - 1.2)                     | 0.9 (0.8 - 1.1)         | 0.060          |
| LDL cholesterol (mmol/L)    | 2.5 (2 - 3.1)               | 2.4 (1.9 - 3)                     | 2.5 (1.9 - 3.1)         | 0.356          |
| VLDL cholesterol (mmol/L)   | 0.7 (0.5 - 0.9)             | 0.7 (0.5 - 0.9)                   | 0.7 (0.5 - 0.9)         | 0.676          |
| ALT (μKat/L)                | 0.6 (0.4 - 0.9)             | 0.6 (0.4 - 0.9)                   | 0.6 (0.4 - 0.8)         | 0.993          |
| AST (μKat/L)                | 0.6 (0.4 - 0.8)             | 0.6 (0.4 - 0.8)                   | 0.6 (0.4 - 0.8)         | 0.662          |
| GGT (μKat/L)                | 0.4 (0.3 - 0.6)             | 0.4 (0.2 - 0.6)                   | 0.4 (0.3 - 0.5)         | 0.596          |
| Steatosis grade (%)         | 5 (1 - 10)                  | 15 (10 - 32.50)                   | 50 (40 - 70)            | <0.001         |
| Steatosis score, n (%)      |                             |                                   |                         | <0.001         |
| 0                           | 249 (72)                    | 63 (20)                           | -                       |                |
| 1                           | 91 (26)                     | 170 (55)                          | 19 (11)                 |                |
| 2                           | 7 (2)                       | 74 (24)                           | 92 (53)                 |                |
| 3                           | -                           | 4 (1)                             | 62 (36)                 |                |
| Lobular inflammation, n (%) |                             |                                   |                         | < 0.001        |

|                             |           |            |           |
|-----------------------------|-----------|------------|-----------|
| 0                           | 99 (29)   | 15 (5)     | -         |
| 1                           | 209 (61)  | 167 (54)   | 52 (30)   |
| 2                           | 34 (9.9)  | 103 (33.3) | 96 (55.5) |
| 3                           | -         | 24 (7.8)   | 25 (14.5) |
| Ballooning, n (%)           |           |            | < 0.001   |
| 0                           | 260 (76)  | 90 (29)    | 6 (4)     |
| 1                           | 76 (22.3) | 154 (49.7) | 83 (48.0) |
| 2                           | 5 (1.5)   | 66 (21.3)  | 84 (48.6) |
| Fibrosis, n (%)             |           |            | < 0.001   |
| 0                           | 70 (21)   | 17 (6)     | 12 (7)    |
| 1                           | 136 (40)  | 107 (35)   | 36 (21)   |
| 2                           | 112 (33)  | 137 (45)   | 66 (39)   |
| 3                           | 22 (7)    | 42 (14)    | 52 (31)   |
| 4                           | -         | 1 (0)      | 3 (2)     |
| NAFLD Activity Score, n (%) |           |            | < 0.001   |
| 0                           | 49 (14)   | -          | -         |
| 1                           | 128 (37)  | -          | -         |
| 2                           | 170 (49)  | -          | -         |
| 3                           | -         | 183 (59)   | -         |
| 4                           | -         | 128 (41)   | -         |
| 5                           | -         | -          | 100 (58)  |
| 6                           | -         | -          | 54 (31)   |
| 7                           | -         | -          | 17 (10)   |
| 8                           | -         | -          | 2 (1)     |

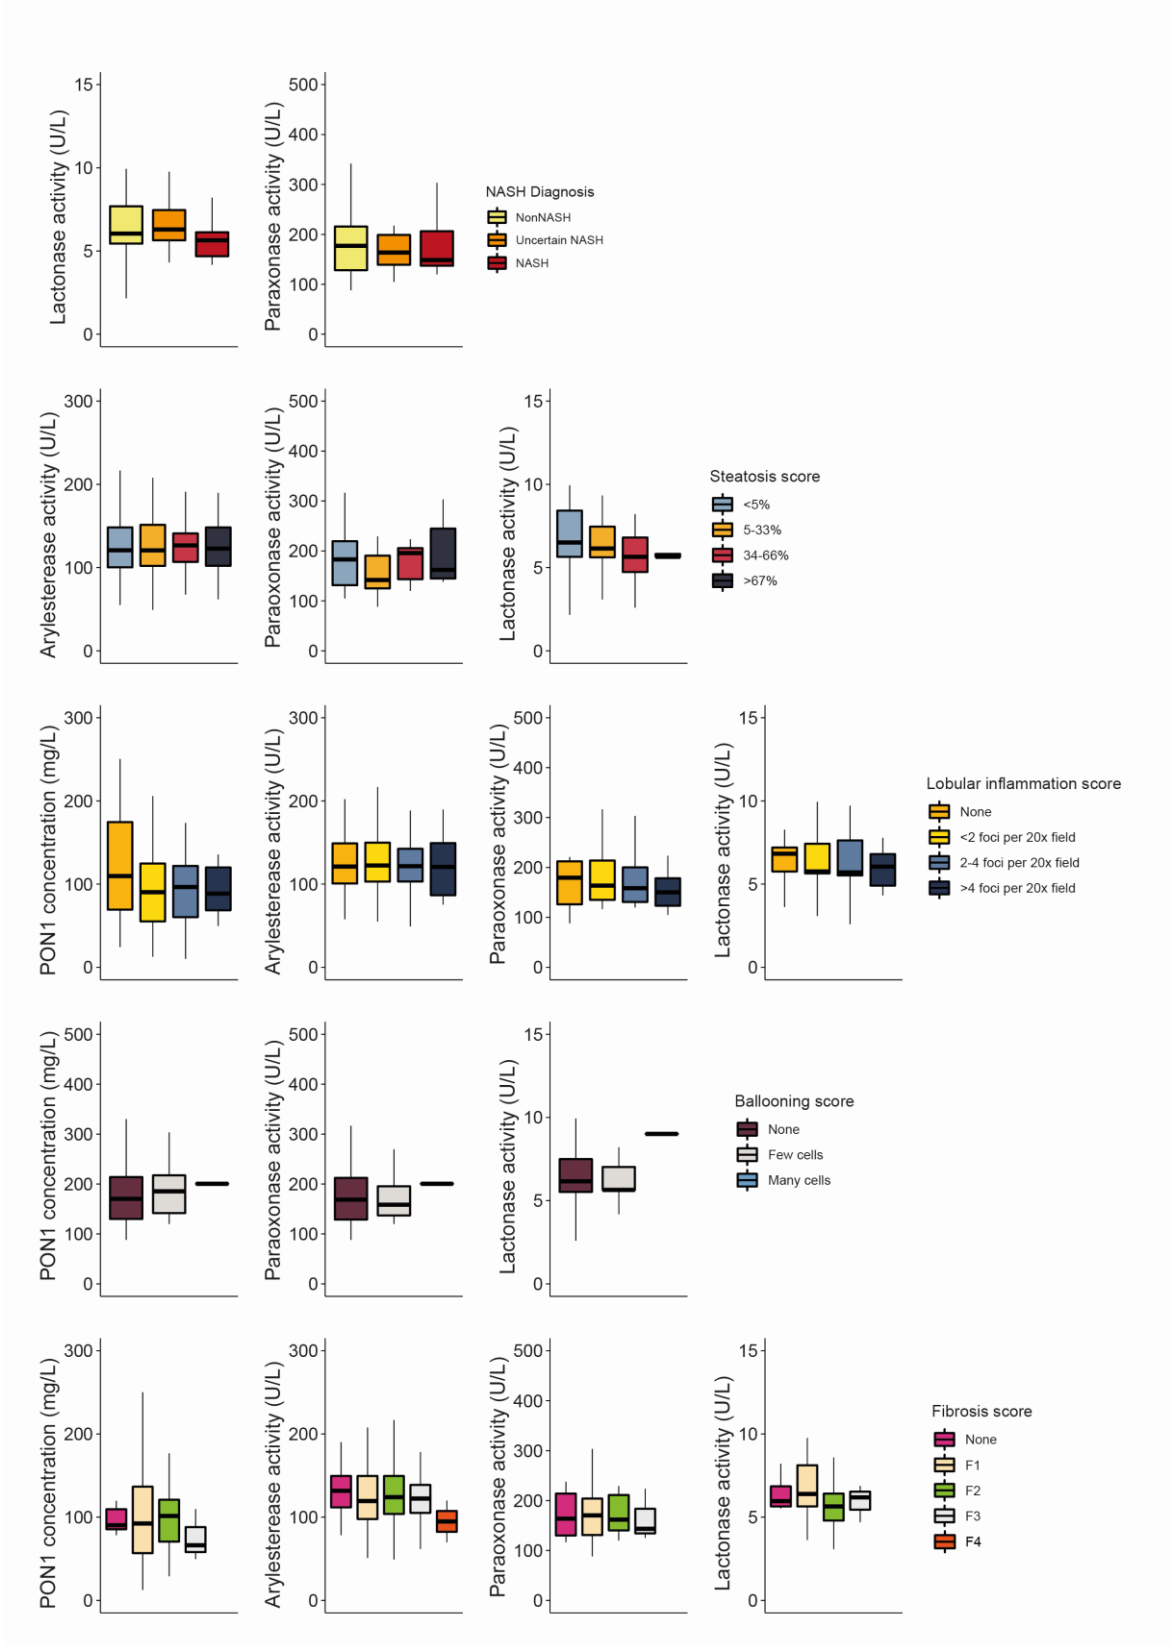

**Figure S2.** Paraoxonase-1 (PON1)-related variables in morbidly obese patients segregated according to the histopathological characteristics of liver biopsies.

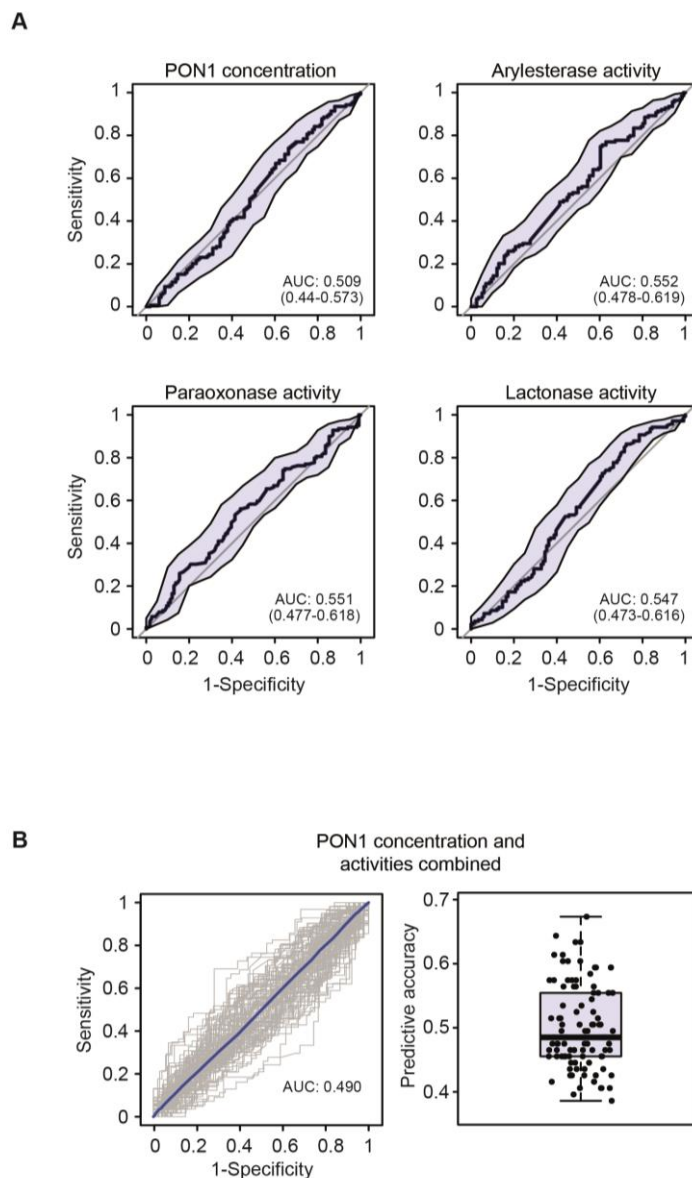

**Figure S3.** Paraoxonase-1 (PON1) concentration and activities were not able to predict NASH in morbidly obese patients. (A) Receiver operating characteristics (ROC) of PON1-related variables. (B) ROC from the predictive model built with linear supervised vector machine (SVM) and its accuracy.
